1 **Predicting systemic and pulmonary tissue barrier concentration of orally inhaled drug**  
2 **products**

3 Narender Singh, PhD,<sup>1\*</sup> Ravi Kannan, PhD,<sup>1</sup> Ryan Arey, MS,<sup>1</sup> Ross Walenga, PhD,<sup>2</sup> Andrew  
4 Babiskin, PhD,<sup>2</sup> and Andrzej Przekwas, PhD<sup>1</sup>

5  
6 <sup>1</sup>CFD Research, Huntsville, Alabama, United States of America

7 <sup>2</sup>Division of Quantitative Methods and Modeling, Office of Research and Standards, Office of  
8 Generic Drugs, Center for Drug Evaluation and Research, U.S. Food and Drug Administration,  
9 Silver Spring, Maryland, United States of America

10

11 \* Corresponding author

12 E-mail: [narender.singh@cf-d-research.com](mailto:narender.singh@cf-d-research.com) (NS)

13

14 **Abstract**

15 The complex physiology and anatomy of the lungs and the range of processes involved in  
16 pulmonary drug transport and disposition make it challenging to predict the fate of orally inhaled  
17 drugs. This study aimed to develop an integrated computational pharmacology approach to  
18 mechanistically describe the spatio-temporal dynamics of inhaled drugs in both systemic  
19 circulation and site-specific lung tissue. The model included all the physiologically relevant  
20 pulmonary processes, such as deposition, dissolution, transport across lung barriers, and  
21 mucociliary clearance, to predict the inhaled drug pharmacokinetics. For validation test cases,

22 the model predicted the fate of orally inhaled budesonide (highly soluble, mildly lipophilic) and  
23 fluticasone propionate (practically insoluble, highly lipophilic) in healthy subjects for: i)  
24 systemic and site-specific lung retention profiles, ii) aerodynamic particle size-dependent  
25 deposition profiles, and iii) identified the most impactful drug-specific, formulation-specific, and  
26 system-specific property factors that impact the fate of both the pulmonary and systemic  
27 concentration of the drugs. In summary, the presented multiscale computational model can guide  
28 the design of orally inhaled drug products to target specific lung areas, identify the effects of  
29 product differences on lung and systemic pharmacokinetics, and be used to better understand  
30 bioequivalence of generic orally inhaled drug products.

## 31 **Author summary**

32 Despite widespread use of available orally inhaled drug products (OIDPs), much is  
33 unknown regarding their optimal lung deposition, targeted delivery to specific lung regions, and  
34 the effects of various device, formulation, and physiological factors on deposition, absorption,  
35 transport, and clearance. In this study, we have presented a multiscale computational framework  
36 that integrates a full-scale 24 generation 3D lung model with distinct barrier regions spanning  
37 trachea, tracheobronchial, alveolar, and the terminal alveolar sacs with multiple other modules to  
38 track the OIDP levels (concentration) in both blood and pulmonary tissue regions. Along with  
39 validating the framework on two different inhaled drug types, we have also presented a  
40 sensitivity analysis to highlight the most impactful drug and formulation parameters, and  
41 therefore, potential optimization parameters to modulate lung selectivity and to better understand  
42 the pulmonary retention of drugs in distinct lung regions.

## 43 **Introduction**

44           Respiratory diseases, such as asthma and chronic obstructive pulmonary disease, are  
45 among the leading causes of morbidity and mortality worldwide with an increasing burden on the  
46 healthcare and economies of all nations.[1] In most cases, the inhaled route of administration is  
47 the preferred method for delivering therapeutics for respiratory diseases, where treatment  
48 efficacy depends primarily on the quantity of drug deposited and distributed within the lung or at  
49 the specific site of action, which may be the upper or lower lungs.[2,3] Compared to oral or  
50 intravenous routes, the inhalation route offers several advantages, such as: i) promoting high  
51 local drug concentrations directly at the site of action in diseased lung tissue, which may not be  
52 achievable efficiently by other routes,[4] ii) avoiding “first pass metabolism” of the liver which  
53 can greatly reduce drug concentrations before the drug reaches the systemic circulation,[5,6] iii)  
54 rapid absorption (within minutes) due to large surface area of the lungs and high vasculature,[7]  
55 iv) favorable lung-selectivity (pulmonary efficacy/systemic safety ratio) that minimizes  
56 toxicity,[8,9] and v) as an alternate route of administration for drugs that are effective  
57 systemically, but are not suitable for oral or intravenous administration, primarily due to low  
58 bioavailability.[10]

59           At present, a large number of different types of inhalation devices exist in the U.S.  
60 market to deliver range of active pharmaceutical ingredients for the treatment of respiratory  
61 diseases.[11,12] However, despite the widespread use of these orally inhaled drug products  
62 (OIDPs), much is unknown with respect to achieving optimal lung deposition, targeted delivery  
63 to specific lung sites, and the effects of various device, formulation, and physiological factors on  
64 deposition, absorption, transport, and clearance of these products. These limitations, along with

65 the impracticality of obtaining human lung tissue concentration data of the delivered drug also  
66 make it difficult to evaluate and establish bioequivalence of potential generic products without a  
67 comparative clinical endpoint or pharmacodynamic bioequivalence study in the indicated patient  
68 population.[13]

69         Considering these inherent difficulties, *in silico* modeling offers a relatively efficient and  
70 cost-effective means of accelerating ODP development. At present, many such *in silico* tools  
71 exist ranging from simple compartmental models to more complex physiologically based  
72 pharmacokinetics (PBPK) models. For example, Weber and Hochhaus provided a compartmental  
73 model for simulating human systemic pharmacokinetics of inhaled corticosteroids (ICSs) by  
74 incorporating selected physiological and formulation-related parameters,[14] whereas Boger et  
75 al.[15] and Hendrickx et al.[16] used semi-physiological compartment models to capture key  
76 features of both systemic and lung tissue pharmacokinetics profiles of multiple soluble  
77 bronchodilator drugs to rats and dogs and translated that model to predict the human plasma  
78 profiles. A different approach was employed by Gaz et al.[17] as an alternative to classic  
79 compartmental representations in which lung was further resolved to incorporate bronchial tree  
80 mucosa and smooth muscles to simulate hypothetical bronchodilator response in asthmatic  
81 conditions. An integrated approach of compartmental and PBPK modules has also been  
82 employed by Caniga et al.[18] to simulate rodent pharmacokinetics and its translation to humans.  
83 A similar, but more advanced, integrated model was recently employed by Hartung and  
84 Borghardt, that used a computational framework based on physiologically-structured population  
85 equations to integrate all relevant pulmonary processes mechanistically (deposition, clearance,  
86 dissolution, etc.), and evaluated against data from different clinical studies.[19] Commercially,  
87 the two main available PBPK software packages to model inhaled drug pharmacokinetics are

88 Gastroplus™ (Simulations Plus Inc., Lancaster, CA, USA) which has mechanistic modules for  
89 regional deposition, dissolution, and permeation of inhaled drugs,[20] and SimCyp Simulator™  
90 (Certara, Sheffield, United Kingdom) that has pulmonary delivery modules by reducing  
91 dissolution and epithelial permeation into a single first order process through a single pulmonary  
92 compartment. [For further information on available modeling approaches and their role in the  
93 development of OIDPs and devices, please refer to the reviews by Borghardt et al.,[21] Backman  
94 et al.,[22] and Walenga et al.[13]]

95           Nonetheless, although these previous modeling efforts and available tools have proven to  
96 be useful, assessment of lung-selectivity has so far proven to be elusive and questions remain.  
97 First, the predicted outcome of the drug in the systemic circulation is the result of pulmonary  
98 absorption (lung-to-blood) as well as gut absorption (swallowed fraction-to-blood), and hence,  
99 unbound concentrations of the drug in plasma alone may not be assumed to accurately reflect the  
100 target site-specific concentration in the lung without other justification.[4] Since the drug  
101 concentration in plasma and lung tissue is the result of parallel absorption from both gut and  
102 lungs and recirculation from blood-to-lung, a clear circulatory system (both systemic and  
103 pulmonary) must be defined in models along with the gut absorption models, systemic clearance,  
104 and region-specific mucociliary clearance (MCC) in the upper lung which is swallowed to the  
105 gut.[23-25] Second, in the physiological lung models, the heterogeneous nature of the lung with  
106 distinct differences between the tracheobronchial (also called conduction or central regions),  
107 alveolar regions (also called respiratory or peripheral regions), and alveolus (i.e., terminal  
108 alveolar sacs) should be made. In few previous modeling studies,[18,19] the first two regions  
109 have been included in the modeling, but so far to the authors' knowledge, no one has reported  
110 the separation of terminal alveolar sacs as a separate region. This is important because alveolar

111 sacs are anatomically and physiologically distinct from the alveolar region due to the presence of  
112 a very thin air-blood barrier and surfactant layer. In previous studies, terminal alveolar sacs have  
113 been lumped as part of the alveolar region. Third, pulmonary drug disposition depends on a wide  
114 range of processes, including, the inhalation flow profile, distinct airway geometry, and particle  
115 size distribution (PSD) - all of which combine to produce a heterogeneous deposition pattern  
116 throughout the lungs. Hence, these parameters should ideally be part of the modeling effort  
117 before calculating/modeling further downstream processes of dissolution, MCC, and transport.

118 To address the aforementioned challenges, we present here a multiscale computational  
119 framework (Fig 1) that involves: i) our recently published full-scale 24 generation (Gen) 3D lung  
120 model with distinct barrier regions spanning trachea (Gen 0) to tracheobronchial (Gen 1-15) to  
121 alveolar (Gen 16-23) and to the terminal alveolar sacs (Gen 24);[26] ii) our previously published  
122 and modified computational fluid dynamics (CFD) module, called quasi-3D (Q3D), to calculate  
123 inhalation flow profile and PSD-based drug deposition,[27,28] iii) a first-principles-based and  
124 lung region-specific dissolution and absorption module, iv) a tracheobronchial-region specific  
125 MCC module, and v) a gut absorption module, all connected to whole-body PBPK. Our  
126 simulation outcomes were validated on two distinct ICSs: budesonide (conditions specific to the  
127 Novolizer® device, which under normal inspiratory flow rates shows similar deposition of  
128 budesonide in the lungs of healthy volunteers as the Turbuhaler®)[29]) and fluticasone  
129 propionate (conditions specific to the Diskus® device). Finally, we also present a sensitivity  
130 analysis to highlight the most impactful drug and formulation parameters, and therefore,  
131 potential optimization parameters to modulate lung selectivity and to better understand the  
132 pulmonary retention of drugs in distinct lung regions.

133

134 **Fig 1. Computational framework to simulate orally inhaled drugs.** Computational modules  
135 are shown in blocks whereas the pulmonary processes are in italics.

## 136 **Models**

### 137 **Simulated drugs**

138 The goal of this work is to develop and validate a mechanistic pulmonary  
139 pharmacokinetics model that can capture most of the relevant physiology and biophysics  
140 involved in inhaled drug pathway starting from breathing profile and drug PSD to final outcomes  
141 of drug concentration in systemic plasma and pulmonary tissue. For model validation, we have  
142 selected two different types of ICSs - budesonide and fluticasone propionate. In terms of  
143 physicochemical properties, budesonide has relatively high aqueous solubility and is mildly  
144 lipophilic, whereas fluticasone propionate is practically insoluble and is highly  
145 lipophilic.[23,30,31] These differences impact dissolution, absorption, luminal clearance, and  
146 lung retention time, which in turn influence the final, and distinct, systemic and pulmonary tissue  
147 profile of these drugs.

### 148 **The Quasi-3D (Q3D) lung model**

149 To determine the deposition profile of these drugs, we employed CFDRCs *in house*  
150 developed Q3D technique using a full-scale 3D lung model.[27,28,32,33] The dimensions of the  
151 lung model correspond to the 50th percentile adult U.S. male (172 cm in height, 70 kg mass).

152           **Q3D method.** In many biomedical and engineering problems, physical processes occur in  
153 networks of pipes/tubes, cables, wires, or other one-dimensional (1D) structures. The best  
154 examples are the human vascular system, lymphatic network, neurons with a network of  
155 dendrites and axons, microfluidic channels in biochips, and of course the case of airflow  
156 transport in the lung airways. Full-fledged 3D computational simulations of such large tubing  
157 structures are possible for some cases such as inhaled particle transport and deposition in the  
158 upper lung airways (wherein the total physical time is in the order of seconds).[32,34] However,  
159 3D computational simulations that require a physical time scale greater than several tens of  
160 seconds (or more) are computationally demanding and depending on availability of high  
161 performance computational resources, may not be feasible. This is particularly relevant in  
162 simulating the particle transport/deposition in the lung airways that require several breathing  
163 cycles. A 1D model of a tubing network distributed in a 3D space is well suited to solve such a  
164 problem, as previously shown by authors.[26-28] The major advantages of this approach are the  
165 ease of model setup, high computational speed, simple visualization of results, and an easy link  
166 to compact models such as spring/mass/damper devices, valves, pumps, controllers, and 0D  
167 compartmental models. This method is referred to as the Q3D model, since it solves for all the  
168 3D flow variables of  $\{u,v,w,p\}$  (unlike 1D models) while maintaining the fully developed wall  
169 boundary condition. Details on the Q3D creation, its accuracy, its speed, solution accuracy  
170 (including in the context of the flow in the human lung), problem setup, robustness, details on  
171 the flow solver, the assembly of the matrices, the spatial and temporal schemes, and the  
172 modeling of the turbulent stresses are available in Kannan et al.[27]

173           **Lung model.** Most known lung models typically contain the geometry of only the first 6-9  
174 airway branch generations due to the resolution of available imaging data that does not permit



175 accurate visualization of smaller branches in further generations. A full 24 generation lung model  
176 of an adult male human was developed for this study. Unlike previous full lung models,[35,36]  
177 the newly developed model was used to simultaneously simulate (i) flow transport simulations,  
178 i.e., inhalation and exhalation simulations and (ii) aerosol transport and deposition simulations,  
179 over several breathing cycles. In this section, we will briefly describe the process for: i)  
180 extending the Q3D lung which was extracted from the Zygote stereolithography (STL format) to  
181 the end of the tracheobronchial limit (i.e., Gen 0-15), and ii) constructing the “sac-trumpet” like  
182 control volumes at the end of the tracheobronchial exits to mimic the alveolar region (Gen 16-  
183 23) and terminal alveolar sacs (Gen 24).

184 As the first step, we extended the Zygote lung model to the end of the tracheobronchial  
185 limit. The lung lobes provide the outer boundary for the extension process. Fig 2A-B, shows the  
186 lung lobes, enclosing the original Q3D lung with and without the lobes (created from the Zygote  
187 lung model – details provided on the zygote website: [https://www.zygote.com/poly-models/3d-  
188 male-systems/3d-male-respiratory-system](https://www.zygote.com/poly-models/3d-male-systems/3d-male-respiratory-system)).

189 Next, we adapted the algorithm of Karch et al.[37] to extend the current Q3D airways to  
190 the end of the tracheobronchial limit and implemented sac-trumpet like control volumes at each  
191 of the tracheobronchial outlets (Fig 2C). Fig 2D shows the complete Q3D lung, i.e., after the  
192 insertion of the sac-trumpet control volumes. The total functional residual capacity (FRC) in the  
193 tracheobronchial section (excluding the mouth, nasal, oral, laryngeal, and pharyngeal sections) is  
194 around 165 cc. This volume is similar to values presented in the literature, such as Pichelin et  
195 al.[38] provides a value of around 130 cc for a 1.81 m tall male human, whereas the Weibel  
196 model value is ~155 cc.[39] The overall tracheobronchial lateral surface area of this generated  
197 lung is ~1996 cm<sup>2</sup>. In general, it is difficult to recreate a lung model whose areas and volumes

198 both match that of the real lung because the surface of the airways (and especially the terminal  
199 alveolar sacs) of the actual lung is non-smooth and folded to enhance the lateral surface area.  
200 The tracheobronchial lateral surface area for the real human lung is  $2471 \pm 320 \text{ cm}^2$  as per the  
201 experimental measurements of Mercer et al.[40] The FRC of the developed whole Q3D lung  
202 model is 2611 cc.

203 **Fig 2. The development stages of the full 24 generation 3D lung.** The stages show the original  
204 imaging-based human Zygote lung with tracheobronchial extensions limit up to generation 6-9 in  
205 opaque lobes (A) and (B) transparent lobes; The extension of tracheobronchial limit up to  
206 generation 15 (C); and the whole lung with extensions up to generation 23 and sac-trumpet  
207 representation of terminal alveolar sacs (generation 24) (D). The sac-trumpet representation of  
208 the whole lung is colored by higher to lower pressure (pink>red>yellow>green>blue) for an  
209 inhalation flowrate of 5 L/min.

210 **Lung barriers.** The above developed lung model is then modified to include various  
211 generation-specific barrier layers. Overall, the airway barrier model simulates the MCC (axial  
212 direction, from tracheobronchial→throat→gut) and trans-mucosal transport (radial direction,  
213 from airway lumen→lung tissue→blood), as well as the dissolution of deposited drug on the  
214 airway walls. As described in the Introduction section, the existing models of pulmonary barrier  
215 models use a compartmental approach, in which the pulmonary wall is divided into two “axial”  
216 segments: tracheobronchial and alveolar. Each segment consists of several layers (starting from  
217 the lumen): mucosal gel and sol (together called mucosa), epithelial layer, stroma layer with  
218 embedded airway smooth muscle cells and immune cells, and the pulmonary endothelial layer. It  
219 is important to note that due to the heterogeneous nature of the human lung, the barrier  
220 dimensions for these layers change from generation to generation (Fig 3). For example, the

221 heights of epithelial cells range from 50-80  $\mu\text{m}$  in the trachea[10,41] and gradually taper down to  
222 less than 0.5  $\mu\text{m}$  in the alveolar sacs.[42] Since it is not possible to obtain experimental values of  
223 the changes in these barrier dimensions for all the individual 24 generations, few previous  
224 studies have "lumped" them together in tracheobronchial and alveolar regions with approximate  
225 average dimension values. [Authors suggest the review articles by Frohlich et al.[41] and Patton  
226 and Byron[10] for more discussion in human lung barrier dimensions.]

227 **Fig 3. Schematic of the three different lung regions and barrier layers modeled in this**  
228 **study.** Dimensions are not to scale. [SMC = smooth muscle cells; ISF = interstitial fluid].

229 The optimized values of these dimensions in the two lumped compartments and the  
230 subsequent ordinary differential equations to describe the transport of drugs through these  
231 barriers were first formulated by Yu and Rosania.[43] Briefly, this model lumps the first 16 lung  
232 branches (Gen 0-15) into the conducting region (i.e., tracheobronchial) and the last 9 generations  
233 (Gen 16-24) into the respiratory region (i.e., alveolar). Such lumped models are based on the  
234 approximate structural and functional differences between the conducting and respiratory  
235 regions. In absence of generation-specific experimental data, this also greatly simplifies the  
236 model for drug/particle transport and facilitates a fast and easy simulation of their transport  
237 across the air (lumen)-to-blood barrier.

238 In this work, we have adapted the above-described lung barrier model of Yu and Rosania  
239 into the Q3D framework to simulate the dissolution and transport of the drug across the airway  
240 barrier in the entire airway tree. In this model, at each airway axis position the air-to-blood  
241 barrier, starting from the mucosa to the plasma in lung tissue, is radially divided into several  
242 layers representing each type of cells in the tissue. A set of ordinary differential equations is  
243 solved in each layer to simulate drug dissolution, diffusion, convection (in the mucosal layers),

244 binding and absorption into pulmonary circulations. Some subcellular organelles such as  
245 lysosomes and mitochondria are also modeled as sub-compartments in each layer for their role in  
246 determining drug pharmacokinetics. Also, since the alveolar sacs have significantly different  
247 properties, due to the very thin barrier and presence of surfactant or surface lining liquid –  
248 SLL,[8] from the general alveolar region, in our model we have designated the alveolus as a  
249 separate compartment, called the terminal alveolar sacs region. Though physiologically, the  
250 terminal alveolar sacs can start as early as generation 18, the majority of total alveolar sac  
251 volume comes from generation 24,[38] hence for simplicity the presented model only considers  
252 the terminal alveolar sacs as part of generation 24. The overall schematic of our barrier model of  
253 the different layers and their lung region-specific description is provided in Fig 3. The other main  
254 parametric changes include: i) modified permeability of terminal alveolar sacs region to add  
255 surfactant effects, ii) modified permeability of the alveolar region, iii) modified dissolution  
256 coefficient in the mucosa (which is present in Gen 0-23) and surfactant, and iv) recalibrated  
257 barrier thicknesses in each of the three defined lung regions.

258         The model also accounts for key physicochemical properties of the transported molecules  
259 that are required as model inputs, including: i) logP, ii) blood-to-plasma ratio (B2P), iii) free  
260 fraction of the drug in plasma ( $f_u$ ), iv) particle density, v) diffusivity and solubility in a water-like  
261 fluid (mucosa), vi) tissue barrier permeability, vii) the deposition distribution, viii) the drug  
262 valency, ix) the organ clearance rates for lung, liver, and kidney, and x) partition coefficients.  
263 These parameters determine the transfer rates, i.e., the rate at which the solid drug is converted to  
264 the molecular form and then absorbed into the plasma/tissue.

265         The modified barrier thicknesses (biological parameters) and the key physicochemical  
266 parameters (drug parameters) were finalized using rigorous optimization of the model's systemic

267 output (plasma concentration of inhaled drugs) and its match with the known experimental data.  
268 Whenever possible, the base range of these parameters were within the known bounds of  
269 experimental values. For example, the SLL thickness in the terminal alveolar sacs has been  
270 reported with values of 0.01–0.08  $\mu\text{m}$  by Olsson et al.,[44] 0.1–0.2  $\mu\text{m}$  by Wauthoz and  
271 Amighi,[45] 0.07  $\mu\text{m}$  by Patton and Byron[10] and 0.3  $\mu\text{m}$  by the National Research  
272 Council.[46] Hence, to optimize the value of SLL we used the lowest (0.01  $\mu\text{m}$ ) and highest (0.3  
273  $\mu\text{m}$ ) reported range for this parameter and iteratively optimized it while keeping other parameters  
274 constant and picked the final value that gave us the most optimum simulated budesonide and  
275 fluticasone propionate pharmacokinetics area under the curve (AUC) compared to  
276 experimentally known budesonide and fluticasone propionate AUC in healthy human subjects.  
277 Other biological parameters were similarly optimized by collecting the reported min-max range  
278 in other studies.

279 The previously published values and our final optimized values of the parameters are  
280 shown in Table 1.

281 **Table 1. Drug specific parameters and biological parameters (lung barrier thickness) used**  
282 **in the model for drugs budesonide and fluticasone propionate.**

| <b>Location</b> | <b>Description<br/>(unit)</b> | <b>Model<br/>value</b> | <b>Literature</b> | <b>Model<br/>value</b>        | <b>Literature references</b> |
|-----------------|-------------------------------|------------------------|-------------------|-------------------------------|------------------------------|
|                 |                               | <b>Budesonide</b>      |                   | <b>Fluticasone propionate</b> |                              |
| <b>ED</b>       | Emitted dose<br>fraction      | 1                      | 1[47]             | 0.88                          | 0.87-0.93[48]                |
| <b>logP</b>     |                               | 2.32                   | 2.32[49]          | 3.7                           | 3.89[49]                     |

|                                      |                                       |         |                                                                                   |        |                                                                                           |
|--------------------------------------|---------------------------------------|---------|-----------------------------------------------------------------------------------|--------|-------------------------------------------------------------------------------------------|
|                                      |                                       |         |                                                                                   |        | 3.7[50,51]                                                                                |
| <b>F<sub>u,plasma</sub></b>          | Fraction unbound (%)                  | 0.125   | 0.1-0.12[52]<br>0.12[53]<br>16.1[19]                                              | 0.02   | 1.16[19]<br>0.013-0.020[52]<br>0.1[53,54]                                                 |
| <b>B2P</b>                           | Blood-to-plasma (ratio)               | 0.9     | 0.8-0.9[55]<br>0.6-0.9[52]                                                        | 0.6    | 0.7[56]<br>0.95[57]<br>0.6-0.8[52]<br>1.83[19]                                            |
| <b>Bq</b>                            | Oral bioavailability                  | 0.1     | 0.11[14,49]                                                                       | 0.01   | 0.01[49]<br>0[57]<br><0.01[58]                                                            |
| <b>Systemic clearance</b>            | Clearance (mL/min)                    | 1591.65 | 1000-1400[59]<br>900-1800[60]<br>1416[14]<br>1400[49,54]<br><sup>a</sup> 1400[52] | 847.28 | 1216[14]<br>1150[49,53]<br>1100-1500[61]<br><sup>a</sup> 840[52]<br><sup>a</sup> 1190[54] |
| <b>Lung mucus and SLL</b>            | Diffusion coeff (μ <sup>2</sup> /sec) | 400.639 | 230-510[62]                                                                       | 325.02 | 600[43]<br>22.7[57]                                                                       |
| <b>Terminal alveolar sacs region</b> | Solubility coeff (μg/mL)              | 18.365  | 16(aq)[63]<br>28(aq)[64]<br>1004 (PB)[65]                                         | 0.524  | <0.15(aq)[52]<br>0.14(aq)[49]<br>6 (surfactant)[19]                                       |

|                                                         |                       |                                                       |                                                                                      |                                                  |                                                               |
|---------------------------------------------------------|-----------------------|-------------------------------------------------------|--------------------------------------------------------------------------------------|--------------------------------------------------|---------------------------------------------------------------|
| <b>Tracheobronchial and Alveolar region</b>             |                       | 23.237                                                | 470 (SDS)[66]<br>49 ( <i>in silico</i> )[67]<br>21(aq)[52]<br>30<br>(surfactant)[19] | 0.011                                            | 45[43]<br>2 (SLF)[68]<br>13.1 (SDS)[68]<br>20.3(Survanta)[68] |
| <b>Terminal alveolar sacs region</b>                    | Permeability (cm/min) | 0.1196 <sup>b</sup>                                   | 790.8-1075.8 e-06[69]<br>920.4-991.8 e-                                              | 0.119546 <sup>b</sup>                            | 0.01117252[43]                                                |
| <b>Tracheobronchial and Alveolar region</b>             |                       | 0.0321 <sup>b</sup>                                   | 06[70]<br>1500 e-06[71]                                                              | 0.03106 <sup>b</sup>                             |                                                               |
|                                                         |                       | <b>Same for budesonide and fluticasone propionate</b> |                                                                                      |                                                  |                                                               |
|                                                         |                       | <b>Optimized value</b>                                |                                                                                      | <b>Literature references</b>                     |                                                               |
| <b>Terminal alveolar sacs region: Barrier thickness</b> | SLL (cm)              | 1.0000E-07                                            |                                                                                      | 10 e-07[72]<br>5 e-07[73]<br>1e-7 to 300e-07[41] |                                                               |
|                                                         | Interstitial (cm)     | 1.0001E-05                                            |                                                                                      |                                                  |                                                               |
|                                                         | Epithelial (cm)       | 3.3690E-06                                            |                                                                                      |                                                  |                                                               |
|                                                         | Endothelial (cm)      | 1.0001E-06                                            |                                                                                      |                                                  |                                                               |

|                                                      |                   |            |                         |
|------------------------------------------------------|-------------------|------------|-------------------------|
| <b>Alveolar regions:</b><br><b>Barrier thickness</b> | Mucous (cm)       | 5.5656E-04 | 5e-04[43]               |
|                                                      | Epithelial (cm)   | 9.9991E-04 | 3.6e-05[43]             |
|                                                      | Interstitial (cm) | 1.9998E-04 | 1.63e-04[43]            |
|                                                      | Endothelial (cm)  | 3.0031E-05 | 4.74e-05[43]            |
| <b>Tracheobronchial region: Barrier thickness</b>    | Mucous (cm)       | 1.1495E-03 | 1.5e-03 to 3e-03[41,74] |
|                                                      | Epithelial (cm)   | 5.0023E-03 | 5.00E-03[43]            |
|                                                      | Interstitial (cm) | 4.9995E-04 | 3.50E-04[43]            |
|                                                      | SMC (cm)          | 5.9995E-03 | 4.80E-03[43]            |
|                                                      | Endothelial (cm)  | 4.9997E-05 | 4.00E-05[43]            |

283 The abbreviations used are SLL = surface lining liquid; SMC = smooth muscle cells; aq =  
 284 aqueous; PB = phosphate buffer; SDS = sodium dodecyl sulfate.

285 <sup>a</sup>Some literature values are converted to 70 kg equivalent for a human male.

286 <sup>b</sup>Permeability note: Overall, the permeability of human airway or alveolar epithelium in vivo or  
 287 in vitro is not known.[75] In most experimental studies, the model used is a single cell layer (in  
 288 vitro models with primarily Calu3 cells) to calculate drug permeability in lungs. However, in our  
 289 lung model, the permeability value optimized is based on permeation through multiple layers of  
 290 cells in lumped lung tissue, and hence there is a substantial difference between the lumped lung



291 tissue optimized permeability in comparison with experimental single cell layer permeability  
292 values. Nonetheless, our optimized value is also close to the previously published Yu and  
293 Rosania value.[43]

294 **Equations for barrier transport.** Only neutral and ionized drug in the aqueous phase is  
295 allowed to transport across radial airway barrier layers. The neutral drug transport is passive and  
296 driven by the activity difference in two neighboring compartments and follows Fick's first law  
297 [Activity here is collective effect of the terms contributing to the total mass flux]. The ionized  
298 drug transport is driven by the electrochemical potential difference and described by the Nernst-  
299 Plank equation. The list of all the transport flux across all the barriers in individual lung regions  
300 is rather large and the authors recommend the Yu and Rosania study for further details.[43] Here,  
301 we are demonstrating the key idea of modeling transport flux and of being linked to other  
302 modules in the computational platform in the following way: Consider the drug flux between the  
303 endothelial compartment (compartment 7) and the plasma compartment (compartment 8) in the  
304 tracheobronchial region (i.e., airway region (AW) as per Yu and Rosania's convention), i.e., the  
305 transport of a neutral drug from endothelial barrier to systemic blood at a specific lung  
306 generation. Since the neutral drug transport is passive and driven by the difference of neutral  
307 drug activity in the aqueous phase in two neighboring compartments it follows Fick's first law:

$$308 \quad J_{AW-n,7-8} = P_{AW-eff,n}(a_{n,AW7} - a_{n,AW8}) \quad (1)$$

309 Here,  $J_{AW-n,7-8}$  is the transport flux on a unit surface area of the neutral drug across the  
310 barrier between (compartment) 7 and 8 in the AW region; it has a unit of drug mass over time  
311 over an area such as  $\mu\text{g}/\text{min}/\text{cm}^2$ ;  $a_{n,AW7/8}$  is the neutral drug activity in the aqueous phase in  
312 compartment 7 or 8 in the airway region; and  $P_{AW-eff,n}$  is the drug permeability of the barrier. The

313 total mass flux rate across the barrier  $J_{AW-n,7-8}$  (with a unit of drug mass over time such as  
314  $\mu\text{g}/\text{min}$ ) is obtained by multiplying the total surface area for drug transport:

$$315 \quad J_{AW-n,7-8} = J_{AW-n,7-8} A_{AW-n,7-8} = P_{AW-eff,n} A_{AW,7-8} (a_{n,AW7} - a_{n,AW8}) \quad (2)$$

316 where  $A_{AW7-8}$  is the area of the barrier.

317 In contrast, the ionized drug transport is driven by the electrochemical potential  
318 difference and described by the Nernst-Plank equation. Hence, the net flux on a unit surface area  
319 of ionized form drug is described by the following equation:

$$320 \quad J_{AW-d,7-8} = P_{AW-eff,d} \frac{N}{e^{N-1}} (a_{d,AW7} - a_{d,AW8} e^N) \quad (3)$$

321 Here,  $J_{AW-d,7-8}$  is the transport flux of the ionized drug across the barrier between  
322 compartment 7 and 8 in the AW region; it has a unit of drug mass over time over an area such as  
323  $\mu\text{g}/\text{min}/\text{cm}^2$ .  $a_{d,AW7/8}$  is the ionized drug activity in the aqueous phase in compartment 7 or 8:

$$324 \quad N = zEF/RT \quad (4)$$

325 where,  $z$  is the electronic charge of the ionized drug molecule,  $E$  is the membrane potential,  $F$  is  
326 the Faraday constant,  $R$  is the universal gas constant, and  $T$  is the absolute temperature.

327 The total mass flux rate of the ionized form drug across the barrier  $J_{AW-d,7-8}$  (with a unit  
328 of drug mass over time such as  $\mu\text{g}/\text{min}$ ) is obtained by multiplying the total area for drug  
329 transport:

$$330 \quad J_{AW-d,7-8} = J_{AW-d,7-8} A_{AW-d,7-8} = P_{AW-eff,d} A_{AW7-8} \frac{N}{e^{N-1}} (a_{d,AW7} - a_{d,AW8} e^N) \quad (5)$$

331 The overall net flux on a unit surface area  $J_{AW,7-8}$  is the sum of the neutral drug flux and  
332 the ionized drug flux. The fluxes between the other compartments are constructed similarly.  
333 These base equations were used in our modeling approach to describe the drug flux between  
334 three regions: tracheobronchial, alveolar and terminal alveolar sacs.

335           **Pulmonary drug deposition.** For budesonide deposition studies in the above-described  
336 lung model, we used Novolizer® dry powder inhaler (DPI) device-specific conditions.  
337 Previously, we have used and published an Euler Lagrangian (E-L) methodology to simulate the  
338 budesonide deposition for the same device using CoBi tools.[32] We used seven bins for the  
339 particle sizes, an aerosol velocity of 30 m/s, and a spread half-angle of 10.5°. More details  
340 related to the simulation setup, including the particle diameters, the distribution of the particles in  
341 the bins, the flow conditions, the spread angle, etc., can be obtained from that study. In the  
342 present work, we have used a Euler Euler (E-E) formulation in the Q3D framework. This is  
343 expected to be much faster than the E-L simulations due to: i) use of larger timesteps for the  
344 aerosol species, as opposed to smaller timesteps for the particles, ii) number of degrees of  
345 freedom being much smaller in the Q3D, as opposed to the large CFD mesh, and iii) faster solver  
346 convergence in the Q3D model, compared to the CFD models, due to the absence of skewed and  
347 high-aspect ratio cells.[32,34] Hence, the current methodology can be used for simulating longer  
348 physiological responses, such as forced exhalation and secondary (multiple) breathing cycles.

349           For fluticasone propionate deposition, we used Diskus DPI device-specific conditions.  
350 For both drugs, we used a starting dose (mass) of 1 mg inhaled drug and used a standard  
351 breathing profile (tidal volume = 0.5 liters, inhalation time = 3 seconds, and exhalation time = 3  
352 seconds), after the initial forced inhalation. The comparison of discretized PSD and flow profile  
353 used in these device-specific simulations is shown in Fig 4 and are obtained from the  
354 experimental studies.[47,76,77]

355           The aerosol transport equations, probabilities of deposition and the mesh independence  
356 studies are provided in the Supplementary Information (SI) document.

357 **Fig 4. Flow rates and particle size distribution (PSD).** The inhalation flow rate (top) and PSD  
358 (bottom) used in the simulations of budesonide and fluticasone propionate.

359 **Mucociliary drug clearance.** Due to the continuous beating of cilia in the upper lung  
360 (especially the tracheobronchial region), the mucus layer covering the cilia moves drug  
361 microparticles towards the pharynx in a coordinated manner to effectively clear the deposited  
362 particles out of the airways, called MCC.[78] Therefore, it is necessary to account for both the  
363 dissolution and MCC processes to accurately characterize the particle deposition dynamics and  
364 patterns in the airways.

365 The MCC convection flow rate in the conducting airway is obtained from the  
366 literature.[79] The mucus velocity  $m_V$  has the following fitted formula:

$$367 \quad m_V = 5.5(1 - \exp(-0.4962D^{2.2694})). \quad (6)$$

$$368 \quad \text{and } T_{muco} = L/m_V \text{ and } k_{muco} = 1/T_{muco}. \quad (7)$$

369  $D$  is the airway diameter,  $T_{muco}$  is the residence time,  $L$  is the airway length,  $k_{muco}$  is the  
370 rate constant of the MCC due to cilia beating.

371 **Pulmonary drug dissolution.** The Noyes-Whitney equation is used to describe the  
372 dissolution process.[80,81] In the computational platform, we use the following equations for  
373 drug dissolution in every control volume, assuming spherical geometry of dry particles of the  
374 drug:

$$375 \quad \frac{dM_S}{dt} = -4\pi r D_{FLUID}(C_S - C_{SOL}) \quad (8)$$

376 Here  $M_S$  is the undissolved drug mass in the compartment,  $C_S$  is the drug solubility  
377 coefficient in the compartment,  $C_{SOL}$  is the local dissolved drug concentration and  $r$  is the  
378 microparticle radius. The above equation is applied in each generation of the lung model.

379 However, the solubility coefficient values (Table 1) for both drugs are different in the terminal  
380 alveolar sacs due to the presence of surfactant in the SLL.[68]

381 **Whole-body drug distribution and clearance.** The drug reaching the outer barrier layer  
382 crosses the pulmonary epithelium and is absorbed into the systemic circulation, which is  
383 simulated as a whole body multi-compartmental PBPK. The organs are represented as well-  
384 stirred reactor 0D compartments. [Details of whole-body PBPK framework can be obtained from  
385 authors earlier publications].[28,82] The drug concentration equation in perfusion rate-limited  
386 organs including fat, brain, bone, heart, muscle, skin, thymus, stomach, pancreas, spleen, and  
387 other is given by:

$$388 \quad V_{\text{tissue}} \frac{dC_{\text{tissue}}}{dt} = Q_{\text{tissue}} \left( C_{\text{artery}} - \frac{C_{\text{tissue}}}{P_{\text{tissue}}} \right), \quad (9)$$

389 where  $V_{\text{tissue}}$  is the tissue volume,  $C_{\text{tissue}}$  is the drug concentration in tissue,  $Q_{\text{tissue}}$  the perfusion  
390 rate,  $C_{\text{artery}}$  is drug concentration in the arterial blood, and  $P_{\text{tissue}}$  is the tissue distribution  
391 coefficient.

392 The drug concentration equation in the permeability rate-limited organs, the liver in  
393 particular, is given by:

$$394 \quad V_{\text{liver}} \frac{dC_{\text{liver}}}{dt} = \left( Q_{\text{HA}} C_{\text{artery}} + R_{\text{portal}} - Q_{\text{liver}} \cdot \frac{C_{\text{liver}}}{P_{\text{liver}}} - CL_{\text{liver}} \cdot \bar{C} \right), \quad (10)$$

395 where  $Q_{\text{HA}}$  is the flow rate in the liver artery,  $R_{\text{portal}}$  is the drug entry rate into the liver via the  
396 portal vein which collects the blood from the stomach, pancreas, spleen, small and large  
397 intestine,  $Q_{\text{liver}}$  is the flow rate in the liver vein and is the sum of the flow rates in the liver artery  
398 and the portal vein,  $\bar{C}$  is the average drug concentration from the liver artery and the portal vein  
399 and  $CL_{\text{liver}}$  is the liver clearance rate.  $R_{\text{portal}}$  is given by:

$$R_{\text{portal}} = \sum_{\substack{j:\text{stomach,small and} \\ \text{large intestines,spleen,and pancreas}}} Q_j \frac{C_j}{P_j} \quad (11)$$

401  $\bar{C}$  is given by:

$$402 \quad \bar{C} = (Q_{\text{HA}} C_{\text{artery}} + R_{\text{portal}}) / Q_{\text{liver}} \quad (12)$$

403 The drug concentration equation in the kidneys is given by:

$$404 \quad V_{\text{kidney}} \frac{dC_{\text{kidney}}}{dt} = Q_{\text{kidney}} \left( C_{\text{artery}} - \frac{C_{\text{kidney}}}{P_{\text{kidney}}} \right) - CL_{\text{kidney}} \cdot C_{\text{artery}}, \quad (13)$$

405 where  $CL_{\text{kidney}}$  is the kidney clearance rate.

406 The drug concentration in the venous compartment is given by:

$$407 \quad V_{\text{vein}} \frac{dC_{\text{vein}}}{dt} = Q_{\text{vein}} (C_{\text{vein,inlet}} - C_{\text{vein}}) \quad (14)$$

408 where  $C_{\text{vein,inlet}}$  is the average drug concentration in blood entering the vein from tissues.

409 The drug concentration in the artery is given by:

$$410 \quad V_{\text{artery}} \frac{dC_{\text{artery}}}{dt} = Q_{\text{artery}} \left( \frac{C_{\text{alveoli}}}{P_{\text{alveoli}}} - C_{\text{artery}} \right) \quad (15)$$

411 Here  $Q_{\text{vein}}$  and  $Q_{\text{artery}}$  are equal to the cardiac output.

## 412 **Results**

### 413 **Drug deposition**

414 Post-inhalation, fractions of drug particles are deposited in the various regions of the  
415 respiratory system following contact with the lung mucous/SLL. This process is influenced by  
416 several factors related to the particles' physicochemical properties as well as physiological and  
417 anatomical features of the lungs.[83] The main physical processes determining respiratory drug  
418 deposition are impaction, sedimentation, and diffusion, which in turn are influenced by particle

419 size, shape and density, as well as breathing patterns, and lung anatomical and physiological  
420 parameters. Following this general pattern, Fig 5 shows the steady-state deposited mass (in  $\mu\text{g}$ ),  
421 for three selected diameter test-cases in our model: large ( $11.4\ \mu\text{m}$ ), medium ( $3.08\ \mu\text{m}$ ), and  
422 small ( $0.613\ \mu\text{m}$ ). The inhaled mass is normalized to  $1\ \mu\text{g}$  (in each diameter bin). The main, and  
423 expected (more deposition of smaller particles in the deeper lung, and vice-versa), observations  
424 are: i) larger particles ( $11.4\ \mu\text{m}$ ) get primarily deposited in the mouth-throat and glottis regions  
425 and we observed very little deposition in the lower lung (alveolar region) and the alveolar sacs  
426 for these particles, ii) we observe some inertial deposition for the medium sized ( $3.08\ \mu\text{m}$ )  
427 particles that primarily get deposited in the upper lung regions and a small fraction in the  
428 alveolar sacs region, and iii) for smaller particles (submicron), we observe significant deposition  
429 in the terminal alveolar sac region. Overall, the deposition percentage values (ratio of the mass  
430 deposited in that region to the dosage mass) for both the tested drugs in the different lung regions  
431 are provided in Table 2. This is in direct correlation with the device-specific PSD data that was  
432 used as input in the model, for example, budesonide (in comparison with fluticasone propionate)  
433 has more particles in the submicron range and also in the particles that are larger than  $10\ \mu\text{m}$ , and  
434 hence, shows slightly larger values of deposited fraction in terminal alveolar sacs for these  
435 submicron particles, and in the mouth-throat and tracheobronchial regions for the larger particles,  
436 as compared to fluticasone propionate. In contrast, fluticasone propionate has more drug particles  
437 in the range between  $3\text{-}9\ \mu\text{m}$  that can bypass the upper lung generations but cannot travel all the  
438 way to the terminal alveolar sacs, and hence, has a higher predicted value of deposition of drug  
439 particles in the alveolar region.

440 **Fig 5. Deposition pattern.** The steady-state deposited mass (in  $\mu\text{g}$ ) is shown for three selected  
441 particle sizes to highlight the size-based inhaled drug deposition for budesonide (A-C) and

442 fluticasone propionate (D-F). Inhaled mass is normalized to 1  $\mu\text{g}$ . Red to blue shows higher to  
443 lower deposition.

444         Using this Q3D E-E method, the total lung deposition fraction (without trachea, which  
445 was 1.8% of the metered dose) for budesonide was predicted to be 47% of the metered dose.  
446 This falls outside of the experimental mean value of 36.5% (recalculated from the 9.4 – 41%  
447 (median 32.1%) as described by in vivo  $\gamma$  scintigraphy studies of budesonide deposition by  
448 Newman et al.[29] The data from the highest peak inspiratory flow rate (PIFR) of 99 LPM were  
449 used for comparison as this flow rate value is most consistent with the intended operating flow  
450 rate of the simulated device at a standard 4 kPa pressure drop. The study by Newman et al. has  
451 further provided the deposition fractions of central, intermediate, and peripheral lung regions;  
452 however, we have refrained from making simulation comparison with these values due to lack of  
453 consistence in regional split of lung between the two studies. For example, in computational  
454 models, the data are usually analyzed in terms of fractional deposition in tracheobronchial and  
455 alveolar regions that are designated a specific generational numbers, while the physiological lung  
456 regions are mixtures of generations as recently highlighted by Olsson et al.[84] Moreover, there  
457 are additional differences between the presented modeling protocol and the  $\gamma$  scintigraphy  
458 experiments that could account for the total lung deposition difference. This includes the use of  
459 male lung scan-based model in simulations (the  $\gamma$  scintigraphy study subjects comprised of both  
460 male and female test subjects) and the input PSD profile in modeling (the PSD profile of the DPI  
461 device used in  $\gamma$  scintigraphy study is not provided). Although the PSD profile was not provided  
462 in the Newman et al. [29] study, the fine particle fraction (FPF) was given, which can affect the  
463 regional deposition. The FPF provided by Newman et al. [29] is 34.9% +/- 5.1%, whereas the  
464 FPF ranges from 40-47.5% in the present case (considering the cut-off for the FPF as 5  $\mu\text{m}$ ). The



465 difference in FPF between the simulations and  $\gamma$  scintigraphy experiments may explain why the  
466 prediction for total lung deposition was higher than the in vivo data.

467 **Table 2. The deposited mass (% of metered dose) in different lung regions for budesonide**  
468 **(Novolizer) and fluticasone propionate (Diskus).**

| <b>Lung Region</b>            | <b>Lung Generation</b> | <b>Budesonide (%)</b> | <b>Fluticasone propionate (%)</b> |
|-------------------------------|------------------------|-----------------------|-----------------------------------|
| <b>Mouth-piece</b>            |                        | 11                    | 12                                |
| <b>Mouth-throat</b>           |                        | 40.2                  | 33.98                             |
| <b>Tracheobronchial</b>       | Gen 0-16               | 29.46                 | 17.16                             |
| <b>Alveolar</b>               | Gen 16-23              | 15.43                 | 33.87                             |
| <b>Terminal alveolar sacs</b> | Gen 24                 | 3.91                  | 2.99                              |

#### 469 **Systemic drug concentration**

470 As the first step, before predicting the systemic drug concentration, we identified and  
471 analyzed the appropriate clinical systemic pharmacokinetics datasets for both drugs. The five  
472 available datasets for each of these drugs are shown in Fig 6. It is important to note that: i) all the  
473 selected experimental datasets are based on healthy human subjects, as our developed lung  
474 model is based on healthy lungs, ii) for comparison, all the datasets are normalized to 1 mg dose,  
475 iii) all datasets used only single drug types to avoid synergistic/antagonistic effects, iv) due to the  
476 variation in experimental datasets (for example, a slight difference of 1 mg and 1.2 mg of inhaled  
477 budesonide dose create a dose-normalized difference of two-fold between maximum plasma  
478 concentration ( $C_{max}$ ) and AUC from time zero to infinity ( $AUC_{0-\infty}$ ) values while maintaining the  
479 overall shape of the pharmacokinetics plots), [85,86] our goal is primarily to compare with the

480 *average* time-concentration profile of the collected experimental datasets, and iv) the comparison  
481 matrices of model versus experiments were evaluated in terms of the visual relative shape of the  
482 pharmacokinetic plots, as well as, the quantitative pharmacokinetic parameters ( $C_{\max}$ , time to  
483  $C_{\max}$  ( $T_{\max}$ ), and  $AUC_{0-8hr}$ ).

484 **Fig 6. Plasma (systemic) concentration-time profiles.** The simulated concentration-time  
485 profiles are shown for administration of 1 mg of budesonide inhaled with Novolizer and  
486 fluticasone propionate inhaled with the Diskus devices. Clinical data points: digitalized raw data  
487 from multiple references normalized to 1 mg.[85-89] The black line shows the average of all  
488 clinical data points and red line is the simulation predictions. [Note: Two data points from  
489 Thorsson et al. (1994)[88] are from two different datasets in the same article].

490 Fig 7 shows the predicted plasma systemic pharmacokinetics profile of budesonide and  
491 fluticasone propionate in comparison with the clinical experimental data of healthy patients. For  
492 both cases, the dose-normalized data from literature were in agreement, where the simulation  
493 pharmacokinetic outcomes closely matched the average experimental data in terms of  $AUC_{0-8hr}$   
494 values.  $C_{\max}$  of budesonide is slightly underpredicted, whereas  $T_{\max}$  was underpredicted in both  
495 cases, but all values were well within the experimental range as shown in Fig 7 and Table 3-4.  
496 Noticeably, our model was able to predict the bi-phasic (a peak and a bump) budesonide  
497 response, which was shown in some experimental data to occur within 20 minutes of drug  
498 inhalation. This has previously been observed in the in vivo pharmacokinetics studies of  
499 Mollman et al.[86] and Harrison et al.[85] and is further described in the Discussion section.

500 **Fig 7. The simulated parameter comparison.** The pharmacokinetics parameters comparison  
501 between simulation (Sim) data and average experimental (Exp) data with standard deviation

502 bars. Experimental data points are calculated from digitalized raw data from multiple  
503 references.[85-89]

504 **Table 3. Comparison of predicted budesonide pharmacokinetics parameters with average**  
505 **clinical data calculated from digitized raw data using absolute value of the difference**  
506 **between the two values.**

| <b>Data</b>                                    | <b>AUC<sub>0-8hr</sub> (ng*hr/mL)</b> | <b>C<sub>max</sub> (ng/mL)</b> | <b>T<sub>max</sub> (hr)</b> |
|------------------------------------------------|---------------------------------------|--------------------------------|-----------------------------|
| <b>Harrison et al. (2003)[85]</b>              | 5.389                                 | 2.027                          | 0.077187                    |
| <b>Mortimer et al. (2007)[90]</b>              | 2.392                                 | 1.67                           | 0.21                        |
| <b>Thorsson et al. (1994)[88]</b>              | 2.923                                 | 1.507                          | 0.3                         |
| <sup>a</sup> <b>Thorsson et al. (1994)[88]</b> | 3.552                                 | 1.507                          | 0.3                         |
| <sup>a</sup> <b>Thorsson et al. (2001)[89]</b> | 4.52                                  | 1.636                          | 0.28                        |
| <b>Mollmann et al. (2001)[86]</b>              | 2.53                                  | 0.9                            | 0.17                        |
| <b>Avg experimental data</b>                   | 3.551                                 | 1.541                          | 0.222864                    |
| <b>SD of experimental data</b>                 | 1.192                                 | 0.367                          | 0.088709                    |
| <b>Simulation</b>                              | 3.703                                 | 1.38                           | 0.1                         |

507 <sup>a</sup>Two data points from Thorsson et al. (1994) are from two different datasets in the same article.

508 Also, the reported referenced experimental parameters are calculated from normalized

509 pharmacokinetic plots shown in Fig 6.

510 **Table 4. Comparison of predicted fluticasone propionate pharmacokinetics parameters**  
511 **with average clinical data calculated from digitized raw data.**

| <b>Data</b>                           | <b>AUC<sub>0-8hr</sub> (ng*hr/mL)</b> | <b>C<sub>max</sub> (ng/mL)</b> | <b>T<sub>max</sub> (hr)</b> |
|---------------------------------------|---------------------------------------|--------------------------------|-----------------------------|
| <b>Harrison et al. (2003)[85]</b>     | 0.712                                 | 0.13                           | 1.971477                    |
| <b>Vurtikullird et al. (2016)[91]</b> | 0.71                                  | 0.221                          | 1                           |
| <b>Gillespie et al. (2015)[92]</b>    | 1.684                                 | 0.224                          | 1.1                         |
| <b>Mortimer et al. (2007) [90]</b>    | 0.4                                   | 0.12                           | 1.21                        |
| <b>Mollmann et al. (2001)[86]</b>     | 1.58                                  | 0.188                          | 1.5                         |
| <b>Avg experimental data</b>          | 1.017                                 | 0.177                          | 1.356295                    |
| <b>SD of experimental data</b>        | 0.577                                 | 0.0493                         | 0.391515                    |
| <b>Simulation</b>                     | 0.89                                  | 0.181                          | 1.033333                    |

512 The reported referenced experimental parameters are calculated from normalized  
513 pharmacokinetic plots shown in Fig 6.

514 Fig 8 shows the pulmonary tissue retention profile of the two drugs through simulations.  
515 The provided values are for three different tissue regions (tracheobronchial, alveolar, and  
516 terminal alveolar sacs) along with the average of whole lung tissue, i.e., the average combination  
517 of three regions. Overall, it was observed that: i) both drugs stay in lung tissue (based on the  
518 concentration values) far longer than in the systemic blood (which is presented in Fig 6), ii)  
519 fluticasone propionate is retained in the lung significantly longer than budesonide, perhaps  
520 because of lower solubility and higher lipophilicity, iii) among different regions of the lung, C<sub>max</sub>  
521 is highest in alveolar region > tracheobronchial region > terminal alveolar sacs region, whereas

522  $T_{1/2}$  (half life, time taken for  $C_{max}$  to drop in half) is highest in tracheobronchial region ( $\sim 10_{bud}$   
523 and  $30_{FP}$  hrs) > alveolar region ( $\sim 1_{bud}$  and  $80_{FP}$  hrs) > terminal alveolar sacs region ( $\sim 10_{bud}$  and  
524  $100_{FP}$  minutes), for both drugs.

525 **Fig 8. Pulmonary concentration-time profiles.** Predicted average pulmonary concentration-  
526 time profiles in three different regions of the lung tissue as well as in total lung tissue, after 1 mg  
527 of drug inhalation of budesonide (left) and fluticasone propionate (right). The insert shows a  
528 larger simulation period of 50 hrs (for budesonide) and 150 hrs (for fluticasone propionate).

## 529 **Parameter sensitivity**

530 To investigate model sensitivity, some of the key model parameters were systematically  
531 varied. The optimal parameters that were used to obtain the concentration plots, shown in Fig 6  
532 and Fig 8, were used as the baseline. The 12 individual parameters (except systemic clearance  
533 and logP) were varied from the base value by substituting high and low values (by increasing or  
534 decreasing by a factor of 2) into the model, while holding all other parameters constant. The  
535 parameters of systemic clearance and logP create physiologically unrealistic values if increased  
536 or decreased by a factor of 2, hence we created hypothetical upper and lower bounds for them to  
537 test sensitivity. Here systemic clearance was varied as 800 mL/min and 1800 mL/min for the  
538 lower and upper bounds, and logP was varied as increased or decreased by a factor of 1.5. The  
539 outcomes of parameter effects were quantified by comparing  $AUC_{0-8hr}$  as shown in Fig 9-10. The  
540 individual AUC plots of parameter variations are shown in Fig 11-12.

541 **Fig 9. Sensitivity analysis of the input parameters (Budesonide).** The sensitivity analysis is  
542 shown for the drug physicochemical and lung physiology parameters for budesonide in terms of

543 the absolute percentage change in  $AUC_{0-8hr}$  change from baseline systemic (left) and pulmonary  
544 tissue (right). The larger bars imply a stronger impact of the varied parameter on the respective  
545 pharmacokinetics outcome.

546 \*For clarity, we have shown the axis cut-off of only 0-100% in these plots. The actual value of  
547 parameter “Systemic clearance” in systemic plasma  $AUC_{0-8hr}$  plot above is 130%. As explained  
548 in Section *Parameter sensitivity*, the systemic clearance and logP parameters were varied  
549 differently than by a factor of two.

550 **Fig 10. Sensitivity analysis of the input parameters (Fluticasone propionate).** The sensitivity  
551 analysis is shown for the drug physicochemical and lung physiology parameters for fluticasone  
552 propionate in terms of the absolute percentage change in  $AUC_{0-8hr}$  change from baseline systemic  
553 (left) and pulmonary tissue (right). The larger bars imply a stronger impact of the varied  
554 parameter on the respective pharmacokinetics outcome.

555 \*As explained in Section *Parameter sensitivity*, the systemic clearance and logP parameters were  
556 varied differently than by a factor of two.

557 **Fig 11. Parameter effects on drug concentration-time plots (Budesonide).** Sensitivity  
558 analysis of drug physicochemical and lung physiology parameters for budesonide in terms of  
559 changes in drug concentrations as functions of time compared to baseline (gray line). The graphs  
560 in the upper row show systemic concentration and the lower row shows lung tissue  
561 concentration. Blue lines show parameters increased by a factor of two and the red line shows  
562 parameters decreased by a factor of two, with respect to baseline values.

563 \*As explained in Section *Parameter sensitivity*, the systemic clearance and logP parameters were  
564 varied differently than by a factor of two.

565 **Fig 12. Parameter effects on drug concentration-time plots (Fluticasone propionate).**

566 Sensitivity analysis of drug physicochemical and lung physiology parameters for fluticasone  
567 propionate in terms of changes in drug concentrations as functions of time compared to baseline  
568 (gray line). The graphs in the upper row show systemic concentration and the lower row shows  
569 lung tissue concentration. Blue lines show parameters increased by a factor of 2 and the red line  
570 shows parameters decreased by a factor of 2, with respect to baseline values.

571 \*As explained in Section Parameter sensitivity, the systemic clearance and logP parameters were  
572 varied differently than by a factor of two.

573 Overall, in determining the budesonide systemic drug concentration, the model was most  
574 sensitive to changes in systemic clearance and tracheobronchial barrier thicknesses. For  
575 budesonide lung tissue concentration, the model was most sensitive to changes in all the barrier  
576 thicknesses and drugs permeability.

577 For fluticasone propionate systemic drug concentration, the model was most sensitive to  
578 changes in systemic clearance, dissolution in lung fluid, and diffusion coefficient. For fluticasone  
579 propionate lung tissue concentration, the model was most sensitive to changes in all the barrier  
580 thicknesses and drugs permeability, dissolution in lung fluids, and diffusion coefficient.

581 **Discussion**

582 Predictive tools for inhalation drug modeling have been published since the 1980s. The  
583 majority of these tools used compartmental modeling techniques that do not capture the complex  
584 3D heterogeneity of human lungs and often involve the use of non-physiological parameters (for  
585 instance, simplified one-step drug translocation from the mucous to the plasma or not accounting

586 for the regional barrier thicknesses). Since the site of action of these drugs is the lung tissue as a  
587 whole or specific lung regions that determine efficacy, predicting systemic concentration alone  
588 cannot be used to make predictions of any other events that happen in the lung tissue.  
589 Unfortunately, systemic concentration is the only measurable outcome that can be validated with  
590 certainty in inhalation modeling, and multiple such in vivo (clinical) experimental datasets are  
591 available for different inhalatory drug types. The other outcome of predicted drug concentration  
592 in lung tissue is much more challenging and very few human studies have been published, with  
593 analysis limited to samples collected from bronchial biopsies (lavage or brushing).[30,93] These,  
594 however, are limited to only providing information of the top epithelial layer mixed with mucosa  
595 and do not reflect the true drug concentration in the lung tissue itself. On the other hand, using  
596 pre-clinical animals models creates different types of challenges and uncertainties, such as: i)  
597 many common inhalers (DPIs and some metered dose inhalers) require breath actuation while  
598 most animals are nose-breathers, ii) species-specific heterogeneity in lung anatomy, and iii)  
599 different types of drug clearance mechanisms in animals as compared to humans.[94]

600 Hence, to gain a sound understanding of the features involved in the inhaled drug  
601 journey, the goal of this work was to develop and validate a mechanistic pulmonary PBPK model  
602 that can capture most of the relevant physiology and biophysics involved with the inhaled drug  
603 pathway (Fig 1). Model inputs include the breathing profile and drug PSD, employ all the  
604 relevant step-wise processes - deposition, dissolution, transport, and clearance, and the model  
605 provides final outcomes of drug concentration in systemic blood and different regions of the  
606 pulmonary tissue starting from throat-to-alveolar sacs. This outcome was compared to the  
607 clinical systemic pharmacokinetics data for budesonide and fluticasone propionate. Finally, a  
608 sensitivity analysis was performed to determine the most impactful physicochemical properties



609 of drugs, formulation, and human physiological parameters for potential optimization to achieve  
610 a high lung selectivity and efficacy.

611         Additionally, this is the first instance of using a full-scale 3D lung model in a Q3D CFD  
612 framework to model the deposition, transport, and absorption of drugs in human lungs. The Q3D  
613 model is a simplified version of the 3D model, where the realistic 3D geometry is decomposed  
614 into a series of cylinders.[28] Such a geometry is well suited to model tubular structures like  
615 lungs as shown in Fig 3 and blood vessels,. The main advantage of using the Q3D approach to  
616 model drug absorption is that mucociliary transport of the undissolved and dissolved drug in the  
617 mucosa may be modeled with much greater precision than with a compartmental approach. It is  
618 possible that this enhanced precision will allow the PBPK model to simultaneously capture  
619 pulmonary and gastrointestinal tract absorptions with greater accuracy as discussed in a recent  
620 review of *in silico* methods for generic orally inhaled drug products.[13] In comparison, most  
621 other published studies have used simplified whole-lung dosimetry codes to predict particle  
622 deposition in the respiratory tract.[95,96] The outcomes of these codes were used as inputs in  
623 further downstream modeling of drug pharmacokinetics.[21] Since the analytical/empirical  
624 equations in these codes were primarily designed for a bend, rather than a bifurcation, which  
625 changes the velocity flow path - they may not truly capture the deposition profile of inhaled  
626 lungs.[97]

## 627 **ICS simulations**

628         Of the two different ICSs tested in the presented framework, budesonide has relatively  
629 high aqueous solubility (16-28  $\mu\text{g/mL}$  in water and 470  $\mu\text{g/mL}$  in 0.5% SDS that mimics some  
630 degree of mucosa/surfactant effects), whereas fluticasone propionate is practically insoluble  
631 ( $>0.1 \mu\text{g/mL}$ ) in water and sparingly soluble in SDS. In addition, the difference in lipophilicity

632 between the two drugs affects the dissolution rate of the drug that is deposited in the mucosa.  
633 This low solubility has a three-fold effect on fluticasone propionate pharmacokinetics. First, the  
634 prolonged presence of deposited, undissolved particles of fluticasone propionate in the mucosa  
635 exposes the drug for longer clearance mechanisms by MCC.[23,31] With this mechanism, the  
636 drug further travels from throat-to-mouth-to-gut. In the gut, the final drug absorption in the  
637 systemic circulation is determined by the bioavailability fraction of the drug as well as the other  
638 liver/kidney clearance mechanisms. Second, the prolonged presence of the drug in mucosa is  
639 reflected in slow and extended absorption/transport of the drug in lung tissue barriers, and hence,  
640 it can be expected that pulmonary tissue pharmacokinetics of drug will be observed for many  
641 hours/days. However, no clear experimental data are available to support this. Limited proxy  
642 experiments have been published in human bronchial brush samples that observed the fluticasone  
643 propionate concentration in samples even after 18 hours post inhalation.[93] Third, since the  
644 bioavailability of fluticasone propionate is less than 1% in the gut,[98] the systemic drug  
645 contribution back to the pulmonary region (through pulmonary circulation) will be minimal. In  
646 comparison, budesonide has a gut bioavailability of ~10%, and hence, it is expected that the  
647 fraction of drug that gets absorbed in systemic circulation through the gut will travel back to the  
648 pulmonary region. However, this gut absorbed fraction will only have minor effect on plasma  
649 pharmacokinetics. For examples, in our simulations (Table 2), 40% of the total drug is deposited  
650 in mouth-throat region. This means that only 4% of the total systemic drug contribution comes  
651 from gut absorbed fraction (10% bioavailable fraction of the 40% swallowed fraction from  
652 mouth-throat).

## 653 **Bi-phasic response**

654 Along with efficiently simulating the pharmacokinetic responses of inhaled ICS drugs,  
655 the above-described model can also be used to provide mechanistic insights into phasic  
656 responses. For examples, the in vivo pharmacokinetic studies of Mollmann et al.[86] and  
657 Harrison et al.[85] (Fig 6) has shown a delayed second peak after 10-20 minutes (bi-phasic  
658 response) in budesonide pharmacokinetics. This has also been captured in the presented  
659 simulation results. We hypothesize that this could be due to the difference in absorption  
660 efficiency of different lung regions, i.e., the deposited drug can get absorbed much faster in the  
661 terminal alveolar sacs or alveolar region due to their thin barriers compared to the thick barriers  
662 of the conducting region. To identify this regional contribution, we systematically switched off  
663 (blocked) one region at a time and observed the resulting pharmacokinetic profile of inhaled  
664 budesonide while keeping everything else same.

665 This analysis (Fig 13) shows that: 1) gut absorption has minimal effect on systemic  
666 concentration (gut block vs original simulation), 2) the early peak ( $C_{max}$ ) is due to the fast  
667 absorption from terminal alveolar sacs region as well as alveolar region (tracheobronchial region  
668 block vs original simulation), 3) the sharp peak is still present after alveolar region block, and  
669 absent when terminal alveolar sacs region is blocked, implying that terminal sacs are primarily  
670 responsible for rapid sharp peak of drug concentration after inhalation. Additionally, the bi-  
671 phasic response may be expected based on the PSD profile of inhaled drugs. For example, it is  
672 possible that post-inhalation a fraction of the smallest size drug particles that directly reach the  
673 terminal alveolar sacs region rapidly permeate through the thin air-blood barrier, especially if the  
674 drug solubility is high as in the case of budesonide, thereby causing a rapid and early spike in  
675 systemic blood concentration. Naturally, this also implies that once most of this deposited drug is

676 quickly absorbed from this region, a sudden drop in drug concentration will be observed before  
677 other alveolar region absorption starts contributing to the systemic concentration, causing the  
678 second peak. However, this mechanistic hypothesis has not yet been explored in any  
679 experimental studies. Nonetheless, due to such differences in the properties of these two drugs,  
680 one can expect a short  $T_{\max}$  and a much faster rise in drug concentration in the blood ( $C_{\max}$ ) for  
681 budesonide in comparison with fluticasone propionate. This has been observed in multiple in  
682 vivo pharmacokinetics studies and well matched in presented simulations as shown in Fig 6.

683 **Fig 13. Regional contribution in overall systemic concentration (Budesonide).** The results  
684 shown for the plasma (systemic) concentration-time profiles after administration of 1 mg of  
685 inhaled budesonide. Original simulations results are compared with switching off (blocking) one  
686 region at a time, while keeping everything else same.

## 687 **Impact of change in regional drug deposition**

688 As reported in the Drug deposition Section (Results), the Q3D-predicted total lung  
689 deposition fraction for budesonide (47% of the metered dose), falls outside of the experimental  
690 range of 9.4 – 41% (median 32.1%) described by in vivo  $\gamma$  scintigraphy studies conducted by  
691 Newman et al. [29] This raised the question: Had Q3D predicted the same deposition profile as  
692 calculated by Newman et al. [29], how would that change the predicted systemic  
693 pharmacokinetic outcome? To address this, the budesonide pharmacokinetic simulations were  
694 repeated using the input deposition fraction values provided by Newman et al. [29] Two  
695 approaches were used: (i) the systemic drug concentration was computed while retaining the  
696 previously calibrated parameters based on the Q3D deposition fraction shown in Table 1, and (ii)  
697 the systemic drug concentration was computed by recalibration of these parameters to match the

698 average experimental (clinical) pharmacokinetic profile. The first approach is to gain insight into  
699 the impact regional deposition can have on the systemic pharmacokinetic profile in the absence  
700 of other parameter adjustments, while the latter is to ascertain the impact that different regional  
701 deposition predictions would have during the usual course of model development. As shown in  
702 Fig 14 and Table 5, differences in drug deposition fractions had easily visible impacts on  
703 predicted plasma concentration of the drug. The 14.9% decrease in deposited drug (47% to  
704 32.1%) resulted in a predicted decrease for  $AUC_{0-8hr}$  on a relative basis of ~60% and ~20% using  
705 the first and second approaches, respectively. The predicted relative decrease in  $C_{max}$  was only  
706 about 4% using the second approach but using the first approach the predicted relative decrease  
707 was about 68%. The predicted change in  $T_{max}$  was minor.

708 **Table 5. Comparison of simulated budesonide pharmacokinetics parameters with average**  
709 **clinical data calculated from digitized raw data.**

| <b>Data</b>                                                        | <b><math>AUC_{0-8hr}</math><br/>(ng*hr/mL)</b> | <b><math>C_{max}</math> (ng/mL)</b> | <b><math>T_{max}</math> (hr)</b> |
|--------------------------------------------------------------------|------------------------------------------------|-------------------------------------|----------------------------------|
| <b>Average experimental data</b>                                   | 3.551                                          | 1.541                               | 0.222864                         |
| <b>SD of experimental data</b>                                     | 1.192                                          | 0.367                               | 0.088709                         |
| <b>Simulation (Original)</b>                                       | 3.703                                          | 1.38                                | 0.1                              |
| <b><math>\gamma</math> scintigraphy deposition (Optimized)</b>     | 2.959 (↓ 20.1%)                                | 1.32 (↓ 4.3%)                       | 0.2                              |
| <b><math>\gamma</math> scintigraphy deposition (Not optimized)</b> | 1.511 (↓ 59.2%)                                | 0.444 (↓ 67.8%)                     | 0.1                              |

710 Note: The reported referenced experimental parameters are calculated from normalized  
711 pharmacokinetic plots shown in Fig 6.

712 **Fig 14. Plasma (systemic) concentration-time profiles after administration of 1 mg of**  
713 **inhaled budesonide.** The plots of Average experimental data and Simulation (Original)  
714 predictions are the same as in Fig 6 and are provided for the sake of comparison. In one case, the  
715 Newman et al. [29]  $\gamma$  scintigraphy data are used as inputs while keeping everything (drug and  
716 barrier parameters) same as Simulation (Original), while in the other case these parameters were  
717 optimized to get the best fit with respect to average experimental data.

## 718 **Lung tissue concentration**

719 For pulmonary tissue concentration, the goal of this study is to look at the *trend* of drug  
720 pharmacokinetics in different regions of the lung and not the actual values of tissue concentration  
721 *per se* since it cannot be validated by experimental analysis. As shown in Fig 8, the first main  
722 observation of the simulated outcomes is that the tissue affinity (lung retention profile) for  
723 fluticasone propionate is much larger compared to budesonide. Mechanistically, this is generally  
724 positively correlated to the drug's lipophilicity represented by logP (budesonide = 2.3,  
725 fluticasone propionate = 3.7) and the dissolution rate (which is much lower for fluticasone  
726 propionate) of the drug particles deposited in the lung lumen. Previous *in vitro* studies on  
727 dissolution rates of these two drugs have shown that while budesonide particles were dissolved  
728 within 6 minutes, fluticasone propionate required at least 6-8 hours.[23,31] Others have shown  
729 that only 6-7% of fluticasone propionate deposited on different human lung cells was absorbed  
730 through the cell monolayer during 4 hours, whereas 10 times (60-70%) more budesonide was  
731 transported through the same cell line in the same time period.[99-102] The prolonged presence

732 of fluticasone propionate in the airway lumen and slow absorption in lung tissue is also reflected  
733 in the much longer time for systemic absorption of fluticasone propionate than that of  
734 budesonide (Fig 6). The second main observation is that both drugs showed higher  
735 concentrations in the alveolar region compared to the tracheobronchial region. Experimentally,  
736 this trend was also observed by Himstedt et al. for fluticasone propionate and other respiratory  
737 drugs in animal (rat) models that found a six-fold higher drug affinity for the alveolar  
738 parenchyma than the trachea.[103] However, that study used intravenous administration of drugs  
739 in animals and may not reveal the true dynamics of inhalation administration. The third main  
740 observation is that the average tissue concentration of budesonide can be observed in lung tissue  
741 for up to 40 hours compared to an even longer time period for fluticasone propionate (150+  
742 hours, Fig 8). Surprisingly, budesonide stays in tracheobronchial region for a longer time  
743 compared to alveolar and alveolar sacs regions due to the slower translocation across the thicker  
744 tracheobronchial barriers after faster dissolution but lower lipophilicity. In comparison, the  
745 fluticasone propionate stays in alveolar region for much longer than tracheobronchial region due  
746 to very slow dissolution rate and lack of MCC in alveolar region. However, no experimental  
747 support can be found in published literature to support such long-term region-specific response  
748 of these simulated drugs.

## 749 **Model parameter sensitivity**

750 To investigate model sensitivity, we systematically varied some of the physicochemical  
751 and physiological parameters (Fig 9-12). The overall analysis showed a clear difference in  
752 parameter sensitivity between systemic and pulmonary outcomes, as well as, between the two  
753 ICSs. Among plasma-related parameters, systemic clearance had a significant effect on both  
754 drugs, while B2P and  $f_u$  did not induce much change in  $AUC_{0-8hr}$  values in either of the drugs.

755 For systemic clearance, it is important to note that parameter change by a factor of two created  
756 unphysiological values and hence we picked 800-1800 mL/min as low and high values to test.  
757 Since our baseline itself is ~1600 mL/min for budesonide and ~850 mL/min for fluticasone  
758 propionate, it did create some discrepancy in looking at the low and high range effects.  
759 Nonetheless, the rate of drug clearance in the blood is one of the most significant parameters to  
760 determine systemic AUC.

761         Among physicochemical parameters, diffusion coefficient and dissolution (both  
762 determined by solubility values) changes had minor effects on budesonide pharmacokinetics,  
763 both in systemic and pulmonary tissue. The two-fold increase and decrease in these parameters  
764 only caused a ~5-10% change in  $AUC_{0-8hr}$  compared to baseline. In comparison, for fluticasone  
765 propionate, these parameters induced up to 20-40% change in systemic and 50-90% change in  
766 lung tissue concentration. It is possible that the changes are higher in fluticasone propionate  
767 because the starting (baseline) value itself is significantly low (i.e., practically insoluble) and any  
768 minor change significantly induces higher dissolution of the deposited drug in the mucosa. For  
769 budesonide the solubility is already optimal (very soluble) at baseline, and hence, only minor  
770 changes are observed by the change in these parameters. On other hand, as expected, the effect  
771 of systemic clearance induced minimal effects in pulmonary tissue concentration, whereas the  
772 tissue barrier thicknesses were more significant for both the drugs, where changes to the AUC of  
773 5-30% in budesonide and 22-48% in fluticasone propionate were predicted. For budesonide,  
774 which already has a large solubility coefficient and therefore differences in this parameter do not  
775 play much of role in how fast the drug gets transported into the tissue, it is only the thickness of  
776 tracheobronchial barrier which significantly influence the speed and amount with which drug  
777 permeates into the blood. For much smaller thicknesses of alveolar and terminal alveolar sacs



778 regions, the translocation from these sections is already rapid due to high solubility of  
779 budesonide. In comparison, solubility coefficient and diffusion are the main drivers for  
780 fluticasone propionate transport into the lung tissue barriers. Here the solubility coefficient is  
781 very small and hence a small change to that will result in a great change to the translocating rate  
782 into the tissue. Similarly, the solubility equation has the diffusion coefficient as a pre-multiplier,  
783 hence, the effect of the diffusion coefficient is also significant in determining fluticasone  
784 propionates AUC changes in sensitivity analysis.

785 Overall, most physiological outcomes have nonlinear dependency on any particular  
786 parameter, and the net change in AUC or transport rate, etc., is likely to be a complex interplay  
787 of the individual parameter fluxes. Hence, the goal for these type of fast-running ‘what-if’  
788 scenarios was to: i) explore what type of drug parameters can be explored *a priori* before the  
789 experimental studies (such as formulation design) to increase drug efficacy and reduce systemic  
790 toxicity, ii) identify parameter specific, or combinatory effects of parameters, to explore lung  
791 selectivity index (ratio between pulmonary and systemic exposure ratio) of inhaled drugs, and iii)  
792 to help other modelers in optimizing the lung barrier models for related studies.

## 793 **Limitations**

794 As discussed above, the primary limitation for validating lung pharmacokinetics models  
795 is that there is a lack of pulmonary tissue concentration data, so it is generally not possible to  
796 validate the model against the true metrics of interest. Until this issue is addressed with  
797 experimental support, lung pharmacokinetics model validation will likely be limited to  
798 comparison with systemic drug concentration values, which does not ensure that site of action  
799 tissue concentration predictions are accurate. The closest available comparison is between  
800 predicted and experimentally observed values of regional deposition, where the consequences of

801 potential differences in regional deposition was explored as shown in Table 5 and Fig 13.  
802 However, regional absorption may be different than regional deposition if absorption is  
803 dissolution- or permeability-limited. Other potential limitations in our current framework are a  
804 lack of device specific effects (such as single actuation content and carrier effects for DPIs and  
805 plume geometry and spray pattern for MDIs),[13,104] a lack of other clearance mechanisms  
806 (such as drug phagocytosis by alveolar macrophages and cleared by transport to the lung-  
807 draining lymph nodes),[105,106] and lung region-specific involvement of metabolic and  
808 transported enzymes and proteins that may modulate the lung retention and bioavailability of  
809 some drugs.[107] Hence, overall it is possible that the lung tissue concentration of inhaled drugs  
810 may be overpredicted in absence of these modules in the model framework. A goal in future  
811 versions of this model is to resolve these limitations and thereby improve the prediction process.  
812 Further, as clinical trial data of systemic pharmacokinetics often involves a mixed population  
813 (male and female participants), an equivalent female lung model should also be part of ODP  
814 prediction framework.

815 In conclusion, the presented model is a comprehensive fully mechanistic and  
816 physiologically realistic computational framework that captures multiple processes that are  
817 essential to describe the fate of inhaled drug kinetics. The work also highlights the importance of  
818 drug parameters and physiologic differences between different regions of lung tissues and their  
819 impact on systemic as well as lung retention profile. The expected applications are improvements  
820 in the qualitative and quantitative understanding of inhaled drug behavior, optimization of drugs  
821 and formulations for improved and targeted efficacy, and to aid in the design of clinical trials.

## 822 **Supporting information**

823 **S1 Appendix.** Further details of model's aerosol transport and deposition equations along with  
824 the mesh independence analysis.

## 825 **Acknowledgments**

826 Views expressed in this work do not necessarily reflect the official policies of the U.S. Food  
827 and Drug Administration (FDA); nor does any mention of trade names, commercial practices, or  
828 organization imply endorsement by the U.S. Government. The authors gratefully acknowledge  
829 the guidance and technical feedback of FDA-CDER team.

## 830 **Author Contributions**

### 831 **Narender Singh**

832 ROLES: Conceptualization, Data curation, Formal analysis, Investigation, Methodology,  
833 Resources, Model Software, Visualization, Writing – original draft, Writing – review & editing  
834 AFFILIATION: CFD Research, Huntsville, Alabama, United States of America

### 835 **Ravi Kannan**

836 ROLES: Methodology, Resources, Model Software, Visualization, Writing – original draft,  
837 Writing – review & editing  
838 AFFILIATION: CFD Research, Huntsville, Alabama, United States of America

### 839 **Ryan Arey**

840 ROLES: Methodology, Resources, Model Software  
841 AFFILIATION: CFD Research, Huntsville, Alabama, United States of America

842 **Ross Walenga**

843 ROLES: Conceptualization, Resources, Writing – review & editing

844 AFFILIATION: Division of Quantitative Methods and Modeling, Office of Research and

845 Standards, Office of Generic Drugs, Center for Drug Evaluation and Research, U.S. Food and

846 Drug Administration, Silver Spring, Maryland, United States of America

847 **Andrew Babiskin**

848 ROLES: Conceptualization, Resources, Writing – review & editing

849 AFFILIATION: Division of Quantitative Methods and Modeling, Office of Research and

850 Standards, Office of Generic Drugs, Center for Drug Evaluation and Research, U.S. Food and

851 Drug Administration, Silver Spring, Maryland, United States of America

852 **Andrzej Przekwas**

853 ROLES: Conceptualization, Methodology, Resources, Writing – review & editing

854 AFFILIATION: CFD Research, Huntsville, Alabama, United States of America

855 **References**

856 1. Report (2018) GBD 2017: a fragile world. *Lancet* 392: 1683.

857 2. Chow AH, Tong HH, Chattopadhyay P, Shekunov BY (2007) Particle engineering for  
858 pulmonary drug delivery. *Pharm Res* 24: 411-37.

859 3. Labiris NR, Dolovich MB (2003) Pulmonary drug delivery. Part I: physiological factors  
860 affecting therapeutic effectiveness of aerosolized medications. *Br J Clin Pharmacol* 56:  
861 588-99.

862 4. Cooper AE, Ferguson D, Grime K (2012) Optimisation of DMPK by the inhaled route:  
863 challenges and approaches. *Curr Drug Metab* 13: 457-73.

864 5. Goel A, Baboota S, Sahni JK, Ali J (2013) Exploring targeted pulmonary delivery for  
865 treatment of lung cancer. *Int J Pharm Investig* 3: 8-14.

866 6. Hess DR (2008) Aerosol delivery devices in the treatment of asthma. *Respir Care* 53: 699-  
867 723; discussion 723-5.

- 868 7. van Noord JA, Smeets JJ, Maesen FP (1998) A comparison of the onset of action of  
869 salbutamol and formoterol in reversing methacholine-induced bronchoconstriction.  
870 *Respir Med* 92: 1346-51.
- 871 8. Borghardt JM, Kloft C, Sharma A (2018) Inhaled Therapy in Respiratory Disease: The  
872 Complex Interplay of Pulmonary Kinetic Processes. *Can Respir J* 2018: 2732017.
- 873 9. Lipworth BJ (1999) Systemic adverse effects of inhaled corticosteroid therapy: A systematic  
874 review and meta-analysis. *Arch Intern Med* 159: 941-55.
- 875 10. Patton JS, Byron PR (2007) Inhaling medicines: delivering drugs to the body through the  
876 lungs. *Nat Rev Drug Discov* 6: 67-74.
- 877 11. Ibrahim M, Verma R, Garcia-Contreras L (2015) Inhalation drug delivery devices:  
878 technology update. *Med Devices (Auckl)* 8: 131-9.
- 879 12. Zhong H, Chan G, Hu Y, Hu H, Ouyang D (2018) A Comprehensive Map of FDA-Approved  
880 Pharmaceutical Products. *Pharmaceutics* 10.
- 881 13. Walenga RL, Babiskin AH, Zhao L (2019) In Silico Methods for Development of Generic  
882 Drug-Device Combination Orally Inhaled Drug Products. *CPT Pharmacometrics Syst*  
883 *Pharmacol* 8: 359-70.
- 884 14. Weber B, Hochhaus G (2013) A pharmacokinetic simulation tool for inhaled corticosteroids.  
885 *AAPS J* 15: 159-71.
- 886 15. Boger E, Friden M (2019) Physiologically Based Pharmacokinetic/Pharmacodynamic  
887 Modeling Accurately Predicts the Better Bronchodilatory Effect of Inhaled Versus Oral  
888 Salbutamol Dosage Forms. *J Aerosol Med Pulm Drug Deliv* 32: 1-12.
- 889 16. Hendrickx R, Lamm Bergstrom E, Janzen DLI, Friden M, Eriksson U, et al. (2018)  
890 Translational model to predict pulmonary pharmacokinetics and efficacy in man for  
891 inhaled bronchodilators. *CPT Pharmacometrics Syst Pharmacol* 7: 147-57.
- 892 17. Gaz C, Cremona G, Panunzi S, Patterson B, De Gaetano A (2012) A geometrical approach to  
893 the PKPD modelling of inhaled bronchodilators. *J Pharmacokinet Pharmacodyn* 39: 415-  
894 28.
- 895 18. Caniga M, Cabal A, Mehta K, Ross DS, Gil MA, et al. (2016) Preclinical Experimental and  
896 Mathematical Approaches for Assessing Effective Doses of Inhaled Drugs, Using  
897 Mometasone to Support Human Dose Predictions. *J Aerosol Med Pulm Drug Deliv* 29:  
898 362-77.
- 899 19. Hartung N, Borghardt JM (2020) A mechanistic framework for a priori pharmacokinetic  
900 predictions of orally inhaled drugs. *PLoS Comput Biol* 16: e1008466.
- 901 20. Chaudhuri SR, Lukacova V (2010) Simulating delivery of pulmonary (and intranasal)  
902 aerosolised drugs. *ONdrugDelivery*: 26-30.
- 903 21. Borghardt JM, Weber B, Staab A, Kloft C (2015) Pharmacometric Models for Characterizing  
904 the Pharmacokinetics of Orally Inhaled Drugs. *AAPS J* 17: 853-70.
- 905 22. Backman P, Arora S, Couet W, Forbes B, de Kruijf W, et al. (2018) Advances in  
906 experimental and mechanistic computational models to understand pulmonary exposure  
907 to inhaled drugs. *Eur J Pharm Sci* 113: 41-52.
- 908 23. Edsbacker S, Wollmer P, Selroos O, Borgstrom L, Olsson B, et al. (2008) Do airway  
909 clearance mechanisms influence the local and systemic effects of inhaled corticosteroids?  
910 *Pulm Pharmacol Ther* 21: 247-58.
- 911 24. Sakagami M, Kinoshita W, Sakon K, Makino Y (2003) Fractional contribution of lung, nasal  
912 and gastrointestinal absorption to the systemic level following nose-only aerosol

- 913 exposure in rats: a case study of 3.7- micro m fluorescein aerosols. *Arch Toxicol* 77: 321-  
914 9.
- 915 25. Sturm R (2011) Age-dependence and intersubject variability of tracheobronchial particle  
916 clearance. *Pneumon* 24: 77-85.
- 917 26. Kannan R, Singh N, Przekwas A, Zhou X, Walenga R, et al. (2021) A Quasi-3D model of the  
918 whole lung: Airway extension to the tracheobronchial limit using the constrained  
919 constructive optimization and alveolar modelling, using a sac-trumpet model. *J Comput*  
920 *Des Eng* (ACCEPTED).
- 921 27. Kannan R, Chen ZJ, Singh N, Przekwas A, Delvadia R, et al. (2017) A quasi-3D wire  
922 approach to model pulmonary airflow in human airways. *Int J Numer Method Biomed*  
923 *Eng* 33.
- 924 28. Kannan R, Singh N, Przekwas AJ (2017) A compartment-quasi3D multiscale approach for  
925 drug absorption, transport, and retention in the human lungs. *Int J Numer Method*  
926 *Biomed Eng*.
- 927 29. Newman SP, Pitcairn GR, Hirst PH, Bacon RE, O'Keefe E, et al. (2000) Scintigraphic  
928 comparison of budesonide deposition from two dry powder inhalers. *Eur Respir J* 16:  
929 178-83.
- 930 30. Dalby C, Polanowski T, Larsson T, Borgstrom L, Edsbacker S, et al. (2009) The  
931 bioavailability and airway clearance of the steroid component of budesonide/formoterol  
932 and salmeterol/fluticasone after inhaled administration in patients with COPD and  
933 healthy subjects: a randomized controlled trial. *Respir Res* 10: 104.
- 934 31. Johnson M (1996) Pharmacodynamics and pharmacokinetics of inhaled glucocorticoids. *J*  
935 *Allergy Clin Immunol* 97: 169-76.
- 936 32. Kannan R, Przekwas AJ, Singh N, Delvadia R, Tian G, et al. (2017) Pharmaceutical aerosols  
937 deposition patterns from a Dry Powder Inhaler: Euler Lagrangian prediction and  
938 validation. *Med Eng Phys* 42: 35-47.
- 939 33. Kannan R, Singh N, Przekwas AJ (2018) A quasi-3D compartmental multi-scale approach to  
940 detect and quantify diseased regional lung constriction using spirometry data. *Int J*  
941 *Numer Method Biomed Eng* 34.
- 942 34. Kannan R, Guo P, Przekwas AJ (2015) Particle transport in the human respiratory tract:  
943 formulation of a nodal inverse distance weighted Eulerian–Lagrangian transport and  
944 implementation of the Wind–Kessel algorithm for an oral delivery. *Int J Numer Method*  
945 *Biomed Eng* 32.
- 946 35. Miyawaki S, Choi S, Hoffman EA, Lin CL (2016) A 4DCT imaging-based breathing lung  
947 model with relative hysteresis. *J Comput Phys* 326: 76-90.
- 948 36. Rajaraman PK, Choi J, Hoffman EA, O'Shaughnessy PT, Choi S, et al. (2020) Transport and  
949 deposition of hygroscopic particles in asthmatic subjects with and without airway  
950 narrowing. *J Aerosol Sci* 146: 105581.
- 951 37. Karch R, Neumann F, Neumann M, Schreiner W (1999) A three-dimensional model for  
952 arterial tree representation, generated by constrained constructive optimization. *Comput*  
953 *Biol Med* 29: 19-38.
- 954 38. Pichelin M, Caillibotte G, Katz I, Martonen T (2012) Categorization of Lung Morphology  
955 Based on FRC and Height: Computer Simulations of Aerosol Deposition. *Aerosol Sci*  
956 *Technol* 46: 70-81.
- 957 39. Weibel ER (1991) Design of airways and blood vessels as branching trees. New York: Raven  
958 Press.



- 959 40. Mercer RR, Russell ML, Roggli VL, Crapo JD (1994) Cell number and distribution in human  
960 and rat airways. *Am J Respir Cell Mol Biol* 10: 613-24.
- 961 41. Frohlich E, Mercuri A, Wu S, Salar-Behzadi S (2016) Measurements of Deposition, Lung  
962 Surface Area and Lung Fluid for Simulation of Inhaled Compounds. *Front Pharmacol* 7:  
963 181.
- 964 42. Pinkerton KE, Gehr P, Castañeda A, Crapo JD (2015) Chapter 9 - Architecture and Cellular  
965 Composition of the Air–Blood Tissue Barrier. In: Parent RA, editor. *Comparative*  
966 *Biology of the Normal Lung (Second Edition)*. San Diego: Academic Press. pp. 105-17.
- 967 43. Yu JY, Rosania GR (2010) Cell-based multiscale computational modeling of small molecule  
968 absorption and retention in the lungs. *Pharm Res* 27: 457-67.
- 969 44. Olsson B, Bondesson E, Borgström L, Edsbäcker S, Eirefelt S, et al. (2011) Pulmonary Drug  
970 Metabolism, Clearance, and Absorption. In: Smyth HDC, Hickey AJ, editors. *Controlled*  
971 *Pulmonary Drug Delivery*. New York, NY: Springer New York. pp. 21-50.
- 972 45. Wauthoz N, Amighi K (2015) Formulation Strategies for Pulmonary Delivery of Poorly  
973 Soluble Drugs. In: Nokhodchi A, Martin GP, editors. *Pulmonary Drug Delivery:*  
974 *Advances and Challenges*: John Wiley & Sons, Ltd.
- 975 46. (1977) *Ozone and Other Photochemical Oxidants*. Washington, DC: The National Academies  
976 Press.
- 977 47. Tian G, Hindle M, Lee S, Longest PW (2015) Validating CFD Predictions of Pharmaceutical  
978 Aerosol Deposition with In Vivo Data. *Pharm Res* 32: 3170-87.
- 979 48. Hill LS, Slater AL (1998) A comparison of the performance of two modern multidose dry  
980 powder asthma inhalers. *Respir Med* 92: 105-10.
- 981 49. Daley-Yates PT (2015) Inhaled corticosteroids: potency, dose equivalence and therapeutic  
982 index. *Br J Clin Pharmacol* 80: 372-80.
- 983 50. Csizmadia F, Tsantili-Kakoulidou A, Panderi I, Darvas F (1997) Prediction of distribution  
984 coefficient from structure. 1. Estimation method. *J Pharm Sci* 86: 865-71.
- 985 51. Tetko IV, Tanchuk VY (2002) Application of associative neural networks for prediction of  
986 lipophilicity in ALOGPS 2.1 program. *J Chem Inf Comput Sci* 42: 1136-45.
- 987 52. Jones RM, Harrison A (2012) A new methodology for predicting human pharmacokinetics  
988 for inhaled drugs from orotracheal pharmacokinetic data in rats. *Xenobiotica* 42: 75-85.
- 989 53. Derendorf H, Hochhaus G, Meibohm B, Mollmann H, Barth J (1998) Pharmacokinetics and  
990 pharmacodynamics of inhaled corticosteroids. *J Allergy Clin Immunol* 101: S440-6.
- 991 54. Lombardo F, Berellini G, Obach RS (2018) Trend Analysis of a Database of Intravenous  
992 Pharmacokinetic Parameters in Humans for 1352 Drug Compounds. *Drug Metab Dispos*  
993 46: 1466-77.
- 994 55. Szeffler SJ (1999) Pharmacodynamics and pharmacokinetics of budesonide: a new nebulized  
995 corticosteroid. *J Allergy Clin Immunol* 104: 175-83.
- 996 56. Andersson P, Brattsand R, Dahlstrom K, Edsbacker S (1993) Oral availability of fluticasone  
997 propionate. *Br J Clin Pharmacol* 36: 135-6.
- 998 57. Boger E, Evans N, Chappell M, Lundqvist A, Ewing P, et al. (2016) Systems Pharmacology  
999 Approach for Prediction of Pulmonary and Systemic Pharmacokinetics and Receptor  
1000 Occupancy of Inhaled Drugs. *CPT Pharmacometrics Syst Pharmacol* 5: 201-10.
- 1001 58. Falcoz C, Oliver R, McDowall JE, Ventresca P, Bye A, et al. (2000) Bioavailability of orally  
1002 administered micronised fluticasone propionate. *Clin Pharmacokinet* 39 Suppl 1: 9-15.
- 1003 59. <https://go.drugbank.com/drugs/DB01222>.
- 1004 60. [https://www.accessdata.fda.gov/drugsatfda\\_docs/label/2009/021324s008lbl.pdf](https://www.accessdata.fda.gov/drugsatfda_docs/label/2009/021324s008lbl.pdf).

- 1005 61. Winkler J, Hochhaus G, Derendorf H (2004) How the lung handles drugs: pharmacokinetics  
1006 and pharmacodynamics of inhaled corticosteroids. *Proc Am Thorac Soc* 1: 356-63.
- 1007 62. Odziomek M, Sosnowski TR, Gradoń L (2015) The Influence of Functional Carrier Particles  
1008 (FCPs) on the Molecular Transport Rate Through the Reconstructed Bronchial Mucus: In  
1009 Vitro Studies. *Transport in Porous Media* 106: 439-54.
- 1010 63. Tashkin DP, Lipworth B, Brattsand R (2019) Benefit:Risk Profile of Budesonide in  
1011 Obstructive Airways Disease. *Drugs* 79: 1757-75.
- 1012 64. Nakowitsch S, Koller C, Seifert JM, König-Schuster M, Unger-Manhart N, et al. (2020)  
1013 Saponin Micelles Lead to High Mucosal Permeation and In Vivo Efficacy of Solubilized  
1014 Budesonide. *Pharmaceutics* 12.
- 1015 65. Mosharraf M, Nyström C (1995) The effect of particle size and shape on the surface specific  
1016 dissolution rate of micro-sized practically insoluble drugs. *Int J Pharm* 122: 35-47.
- 1017 66. Rohrschneider M (2012) Correlation of ICS in vitro dissolution and pulmonary absorption  
1018 (Thesis). Düsseldorf, Germany: Heinrich Heine University Düsseldorf.
- 1019 67. Schilling U (2017) The role of in vitro and pharmacokinetics studies in the bioequivalence  
1020 assessment of inhaled and intranasal corticosteroids (Thesis): University of Florida.
- 1021 68. Kumar A, Terakosolphan W, Hassoun M, Vandera KK, Novicky A, et al. (2017) A  
1022 Biocompatible Synthetic Lung Fluid Based on Human Respiratory Tract Lining Fluid  
1023 Composition. *Pharm Res* 34: 2454-65.
- 1024 69. Meindl C, Stranzinger S, Dzidic N, Salar-Behzadi S, Mohr S, et al. (2015) Permeation of  
1025 Therapeutic Drugs in Different Formulations across the Airway Epithelium In Vitro.  
1026 *PLoS One* 10: e0135690.
- 1027 70. Lee MK, Yoo JW, Lin H, Kim YS, Kim DD, et al. (2005) Air-liquid interface culture of  
1028 serially passaged human nasal epithelial cell monolayer for in vitro drug transport  
1029 studies. *Drug Deliv* 12: 305-11.
- 1030 71. Crowe A, Tan AM (2012) Oral and inhaled corticosteroids: differences in P-glycoprotein  
1031 (ABCB1) mediated efflux. *Toxicol Appl Pharmacol* 260: 294-302.
- 1032 72. Siebert TA, Rugonyi S (2008) Influence of liquid-layer thickness on pulmonary surfactant  
1033 spreading and collapse. *Biophys J* 95: 4549-59.
- 1034 73. Pattle RE (1955) Properties, function and origin of the alveolar lining layer. *Nature* 175:  
1035 1125-6.
- 1036 74. Wanner A (1977) Clinical aspects of mucociliary transport. *Am Rev Respir Dis* 116: 73-125.
- 1037 75. Widdicombe J (1997) Airway and alveolar permeability and surface liquid thickness: theory.  
1038 *J Appl Physiol* (1985) 82: 3-12.
- 1039 76. Kondo T, Hibino M, Tanigaki T, Cassan SM, Tajiri S, et al. (2017) Appropriate use of a dry  
1040 powder inhaler based on inhalation flow pattern. *J Pharm Health Care Sci* 3: 5.
- 1041 77. Tamura G, Sakae H, Fujino S (2012) In vitro evaluation of dry powder inhaler devices of  
1042 corticosteroid preparations. *Allergol Int* 61: 149-54.
- 1043 78. Bustamante-Marin XM, Ostrowski LE (2017) Cilia and Mucociliary Clearance. *Cold Spring  
1044 Harb Perspect Biol* 9.
- 1045 79. Hofmann W, Asgharian B (2003) The effect of lung structure on mucociliary clearance and  
1046 particle retention in human and rat lungs. *Toxicol Sci* 73: 448-56.
- 1047 80. Wang J, Flanagan DR (1999) General solution for diffusion-controlled dissolution of  
1048 spherical particles. 1. Theory. *J Pharm Sci* 88: 731-8.
- 1049 81. Wang J, Flanagan DR (2002) General solution for diffusion-controlled dissolution of  
1050 spherical particles. 2. Evaluation of experimental data. *J Pharm Sci* 91: 534-42.



- 1051 82. Kannan R, Przekwas A (2020) A multiscale absorption and transit model for oral drug  
1052 delivery: Formulation and applications during fasting conditions. *International Journal for*  
1053 *Numerical Methods in Biomedical Engineering* 36: e3317.
- 1054 83. Cheng YS (2014) Mechanisms of pharmaceutical aerosol deposition in the respiratory tract.  
1055 *AAPS PharmSciTech* 15: 630-40.
- 1056 84. Olsson B, Kassinos SC (2021) On the Validation of Generational Lung Deposition Computer  
1057 Models Using Planar Scintigraphic Images: The Case of Mimetikos Preludium. *J Aerosol*  
1058 *Med Pulm Drug Deliv* 34: 115-23.
- 1059 85. Harrison TW, Tattersfield AE (2003) Plasma concentrations of fluticasone propionate and  
1060 budesonide following inhalation from dry powder inhalers by healthy and asthmatic  
1061 subjects. *Thorax* 58: 258-60.
- 1062 86. Mollmann H, Wagner M, Krishnaswami S, Dimova H, Tang Y, et al. (2001) Single-dose and  
1063 steady-state pharmacokinetic and pharmacodynamic evaluation of therapeutically  
1064 clinically equivalent doses of inhaled fluticasone propionate and budesonide, given as  
1065 Diskus or Turbohaler dry-powder inhalers to healthy subjects. *J Clin Pharmacol* 41:  
1066 1329-38.
- 1067 87. Mortimer KJ, Harrison TW, Tang Y, Wu K, Lewis S, et al. (2006) Plasma concentrations of  
1068 inhaled corticosteroids in relation to airflow obstruction in asthma. *Br J Clin Pharmacol*  
1069 62: 412-19.
- 1070 88. Thorsson L, Edsbacker S, Conradson TB (1994) Lung deposition of budesonide from  
1071 Turbuhaler is twice that from a pressurized metered-dose inhaler P-MDI. *Eur Respir J* 7:  
1072 1839-44.
- 1073 89. Thorsson L, Edsbacker S, Kallen A, Lofdahl CG (2001) Pharmacokinetics and systemic  
1074 activity of fluticasone via Diskus and pMDI, and of budesonide via Turbuhaler. *Br J Clin*  
1075 *Pharmacol* 52: 529-38.
- 1076 90. Mortimer KJ, Tattersfield AE, Tang Y, Wu K, Lewis S, et al. (2007) Plasma concentrations  
1077 of fluticasone propionate and budesonide following inhalation: effect of induced  
1078 bronchoconstriction. *Br J Clin Pharmacol* 64: 439-44.
- 1079 91. Vutikullird AB, Gillespie M, Song S, Steinfeld J (2016) Pharmacokinetics, Safety, and  
1080 Tolerability of a New Fluticasone Propionate Multidose Dry Powder Inhaler Compared  
1081 With Fluticasone Propionate Diskus((R)) in Healthy Adults. *J Aerosol Med Pulm Drug*  
1082 *Deliv* 29: 207-14.
- 1083 92. Gillespie M, Song S, Steinfeld J (2015) Pharmacokinetics of fluticasone propionate  
1084 multidose, inhalation-driven, novel, dry powder inhaler versus a prevailing dry powder  
1085 inhaler and a metered-dose inhaler. *Allergy Asthma Proc* 36: 365-71.
- 1086 93. van den Brink KI, Boorsma M, Staal-van den Brekel AJ, Edsbacker S, Wouters EF, et al.  
1087 (2008) Evidence of the in vivo esterification of budesonide in human airways. *Br J Clin*  
1088 *Pharmacol* 66: 27-35.
- 1089 94. Movia D, Prina-Mello A (2020) Preclinical Development of Orally Inhaled Drugs (OIDs)-  
1090 Are Animal Models Predictive or Shall We Move Towards In Vitro Non-Animal  
1091 Models? *Animals (Basel)* 10.
- 1092 95. Asgharian B, Hofmann W, Bergmann R (2001) Particle Deposition in a Multiple-Path Model  
1093 of the Human Lung. *Aerosol Science and Technology* 34: 332-9.
- 1094 96. Phalen RF, Cuddihy RG, Fisher GL, Moss OR, Schlesinger RB, et al. (1991) Main Features  
1095 of the Proposed NCRP Respiratory Tract Model. *Radiation Protection Dosimetry* 38:  
1096 179-84.

- 1097 97. Robinson RJ, Snyder P, Oldham MJ (2008) Comparison of analytical and numerical particle  
1098 deposition using commercial CFD packages: impaction and sedimentation. *Inhal Toxicol*  
1099 20: 485-97.
- 1100 98. Thorsson L, Dahlstrom K, Edsbacker S, Kallen A, Paulson J, et al. (1997) Pharmacokinetics  
1101 and systemic effects of inhaled fluticasone propionate in healthy subjects. *Br J Clin*  
1102 *Pharmacol* 43: 155-61.
- 1103 99. Bur M, Rothen-Rutishauser B, Huwer H, Lehr CM (2009) A novel cell compatible  
1104 impingement system to study in vitro drug absorption from dry powder aerosol  
1105 formulations. *Eur J Pharm Biopharm* 72: 350-57.
- 1106 100. Haghi M, Ong HX, Traini D, Young P (2014) Across the pulmonary epithelial barrier:  
1107 Integration of physicochemical properties and human cell models to study pulmonary  
1108 drug formulations. *Pharmacol Ther* 144: 235-52.
- 1109 101. Haghi M, Traini D, Postma DS, Bebawy M, Young PM (2013) Fluticasone uptake across  
1110 Calu-3 cells is mediated by salmeterol when deposited as a combination powder inhaler:  
1111 Salmeterol-mediated fluticasone uptake. *Respirology* 18: 1197-1201.
- 1112 102. Hein S, Bur M, Schaefer UF, Lehr CM (2011) A new Pharmaceutical Aerosol Deposition  
1113 Device on Cell Cultures (PADD OCC) to evaluate pulmonary drug absorption for metered  
1114 dose dry powder formulations. *Eur J Pharm Biopharm* 77: 132-8.
- 1115 103. Himstedt A, Braun C, Wicha SG, Borghardt JM (2020) Towards a Quantitative Mechanistic  
1116 Understanding of Localized Pulmonary Tissue Retention-A Combined In Vivo/In Silico  
1117 Approach Based on Four Model Drugs. *Pharmaceutics* 12.
- 1118 104. Newman B, Witzmann K (2020) Addressing the Regulatory and Scientific Challenges with  
1119 Generic Orally Inhaled Drug Products. *Pharmaceut Med* 34: 93-102.
- 1120 105. Forbes B, Asgharian B, Dailey LA, Ferguson D, Gerde P, et al. (2011) Challenges in  
1121 inhaled product development and opportunities for open innovation. *Adv Drug Deliv Rev*  
1122 63: 69-87.
- 1123 106. Kirby AC, Coles MC, Kaye PM (2009) Alveolar macrophages transport pathogens to lung  
1124 draining lymph nodes. *J Immunol* 183: 1983-89.
- 1125 107. Rubin K, Ewing P, Backstrom E, Abrahamsson A, Bonn B, et al. (2020) Pulmonary  
1126 Metabolism of Substrates for Key Drug-Metabolizing Enzymes by Human Alveolar Type  
1127 II Cells, Human and Rat Lung Microsomes, and the Isolated Perfused Rat Lung Model.  
1128 *Pharmaceutics* 12.

1129

1130

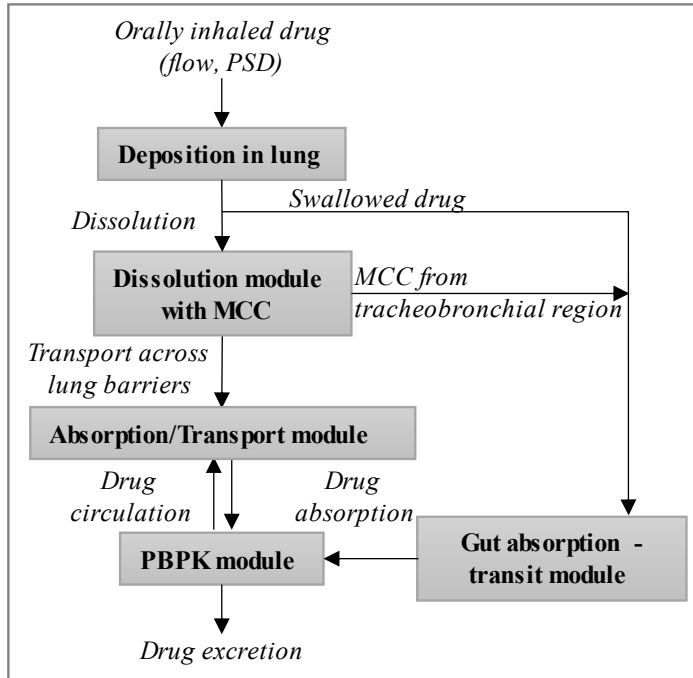

1131

1132 *Fig 1*

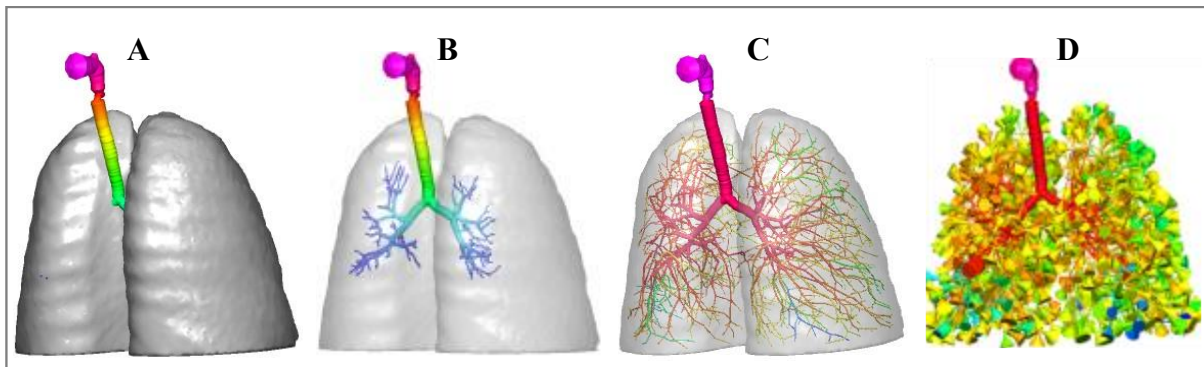

1133

1134 *Fig 2*

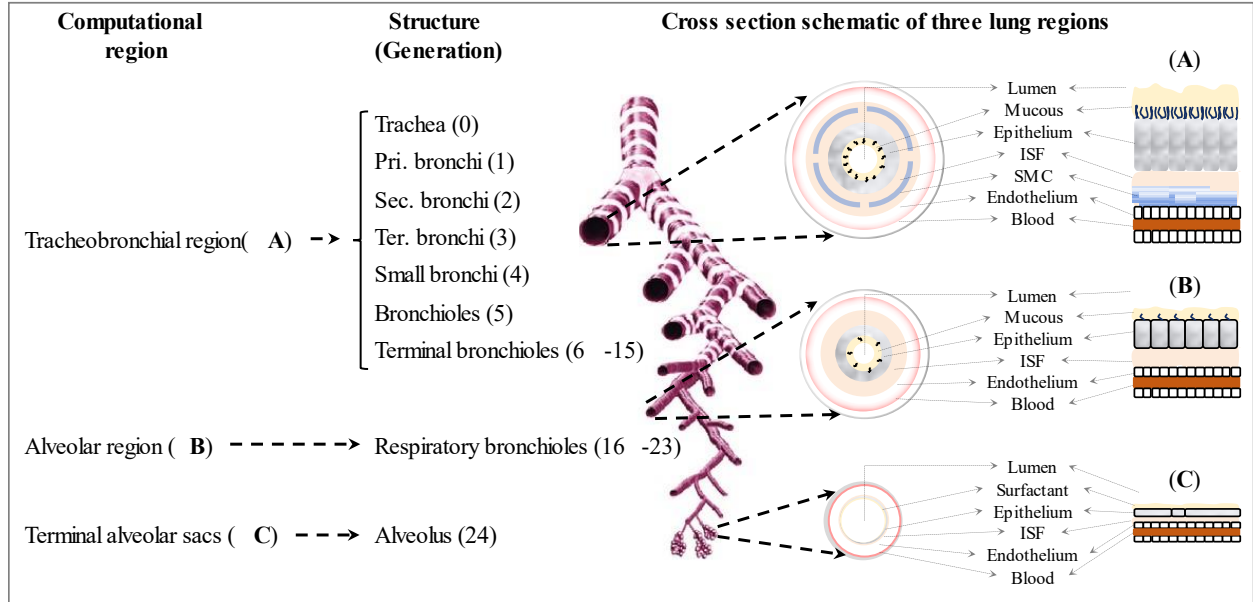

1135

1136 *Fig 3*

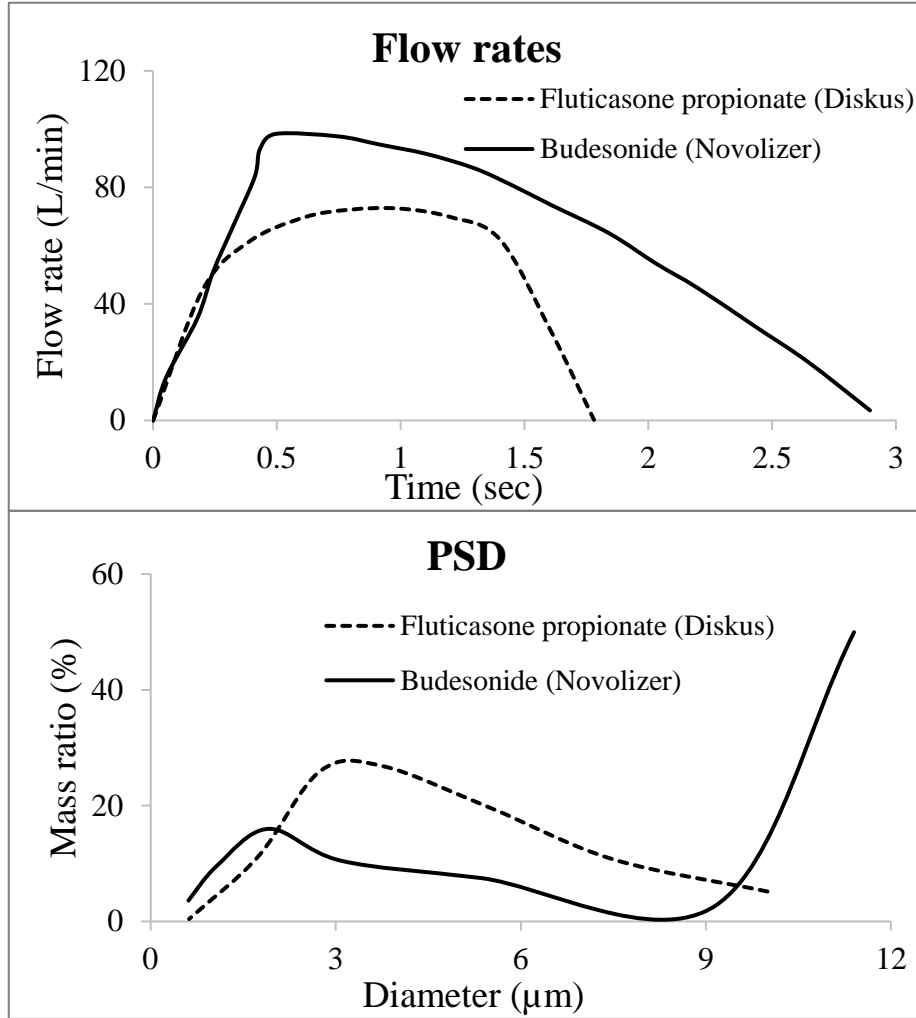

1137

1138 *Fig 4*

1139

1140

1141

1142

1143

1144

1145

1146

1147

1148

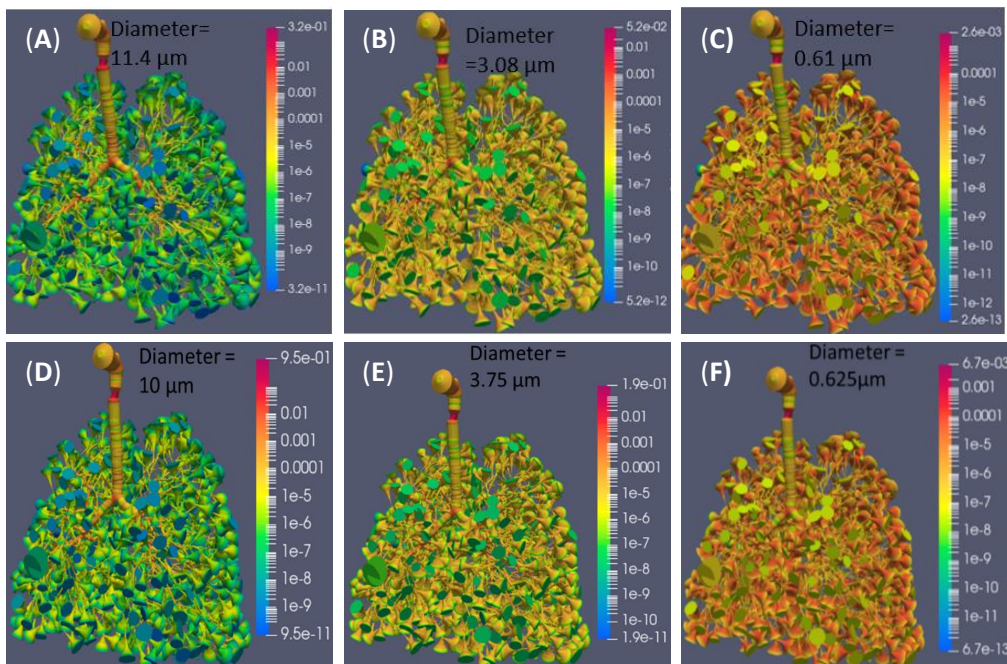

*Fig 5*

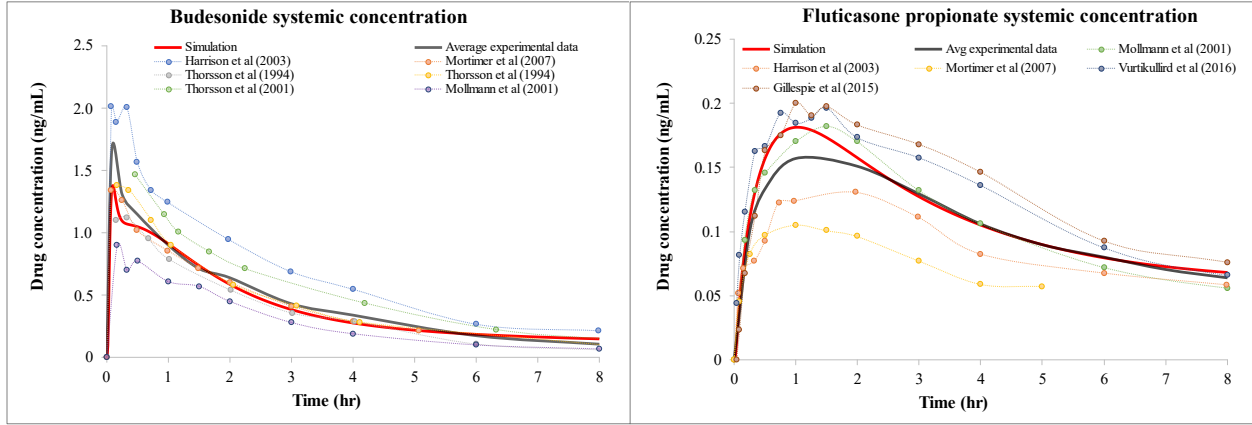

1149

1150 *Fig 6*

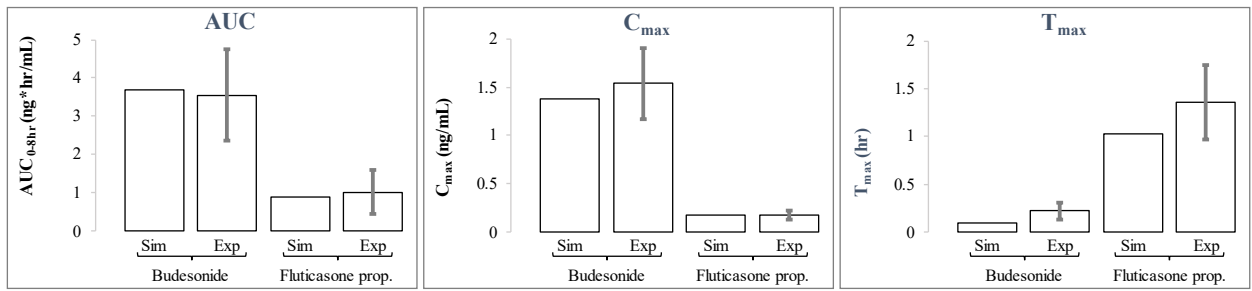

1151

1152 *Fig 7*

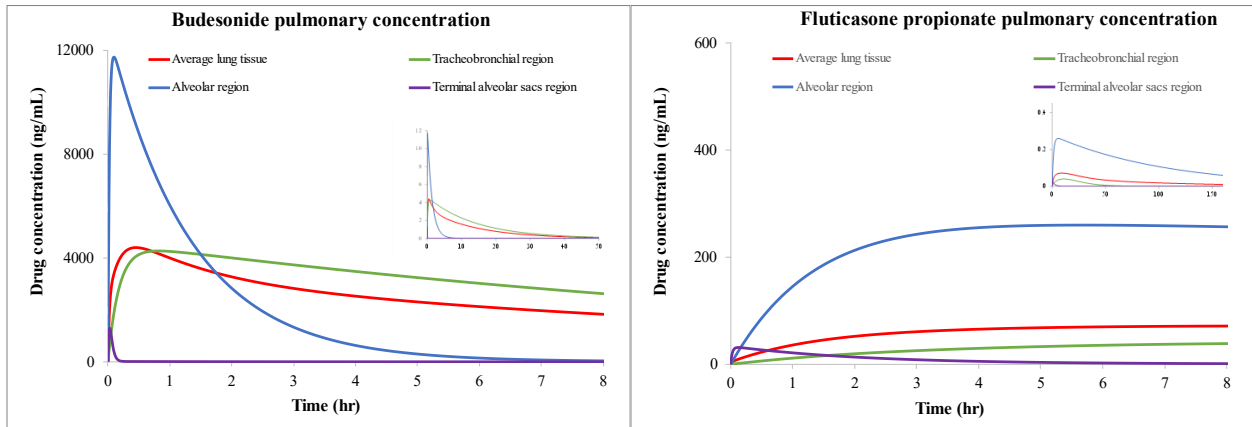

1153

1154 *Fig 8*

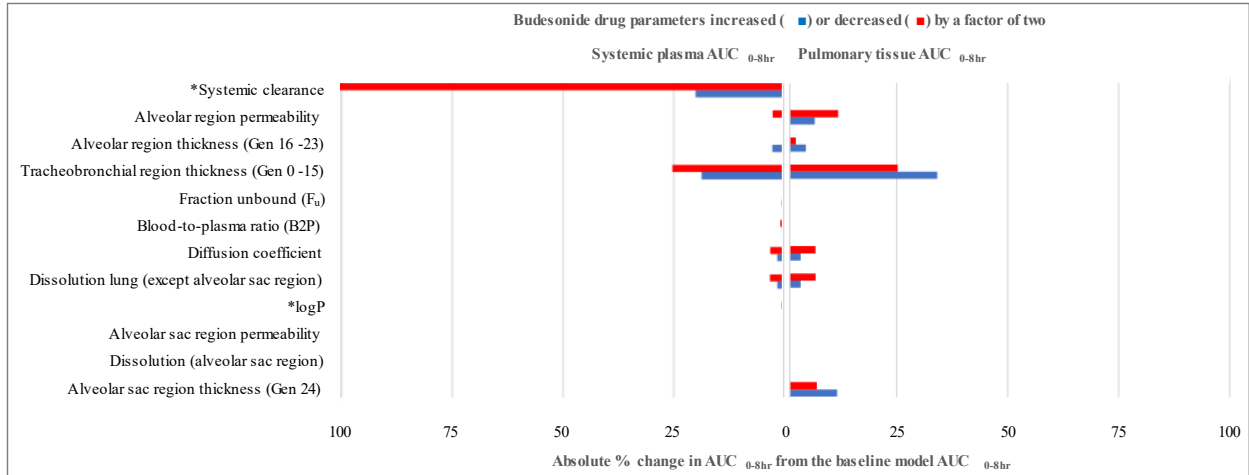

1155

1156 *Fig 9*

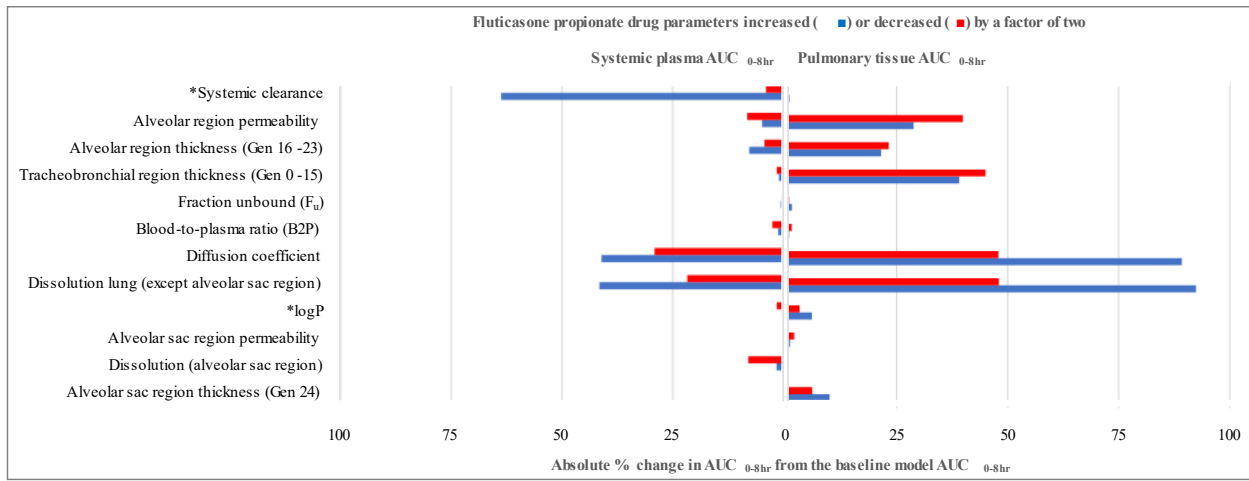

1157

1158 *Fig 10*



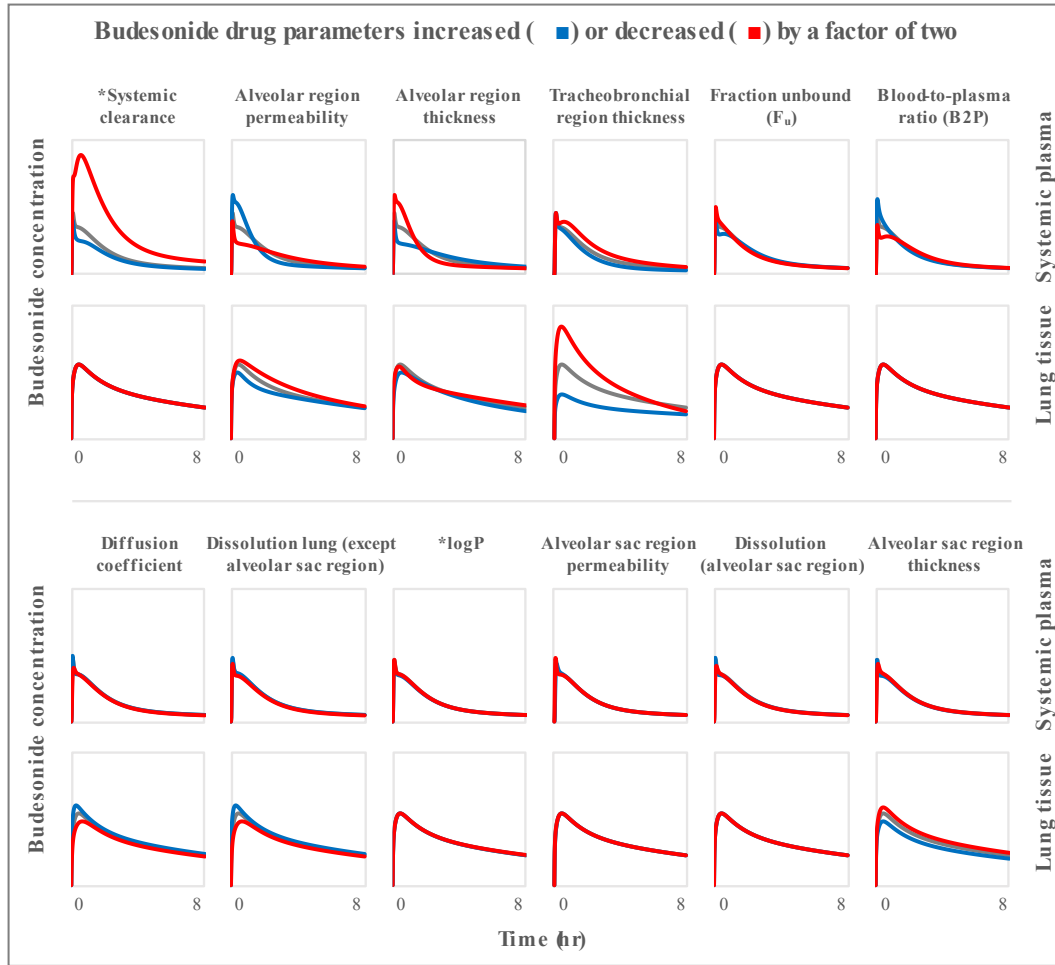

1159

1160 *Fig 11*



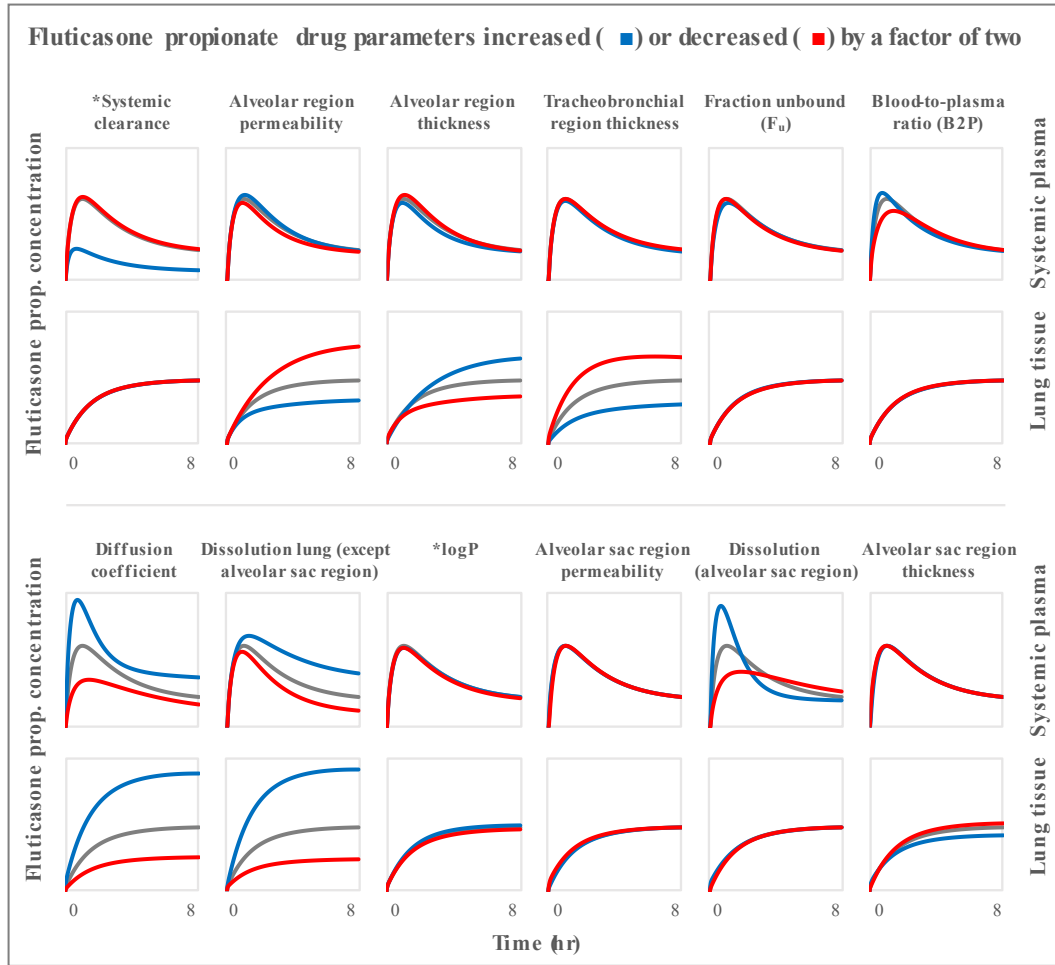

Fig 12

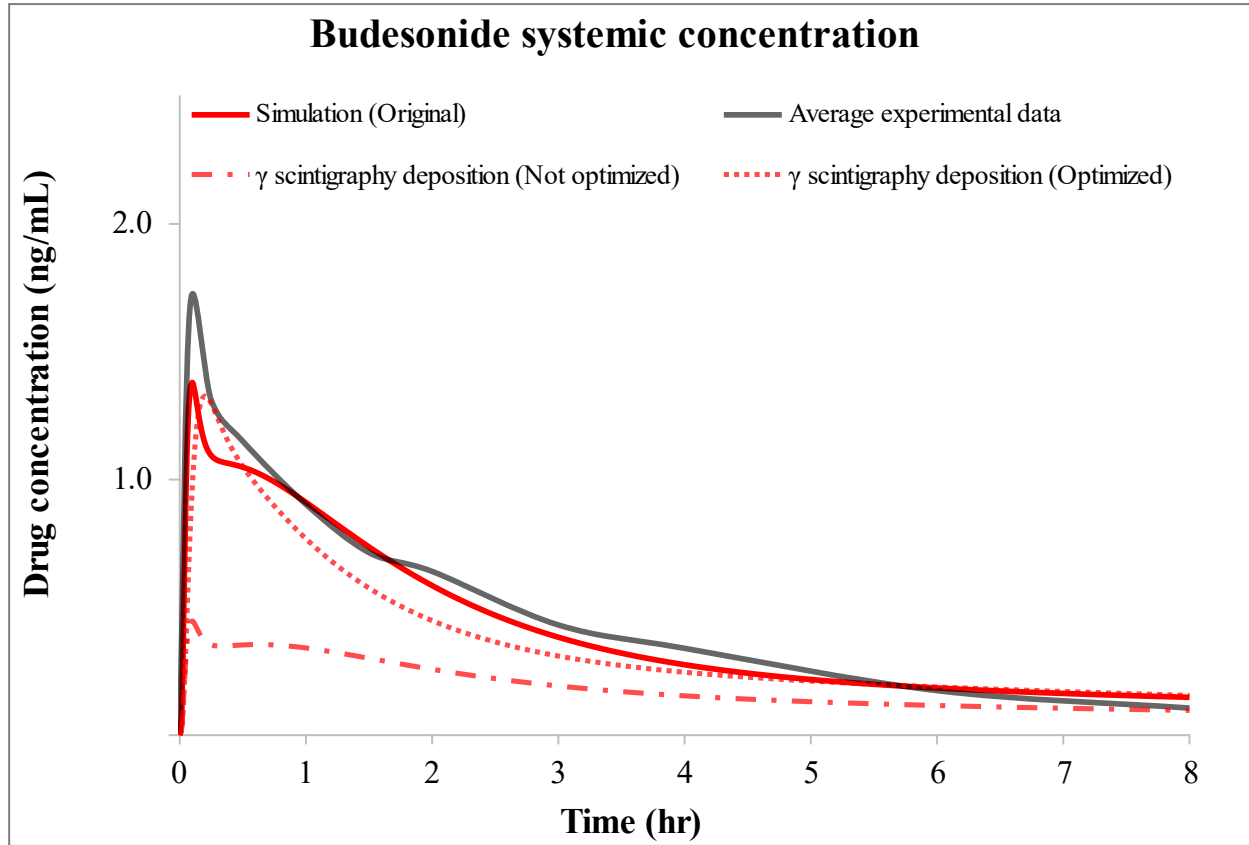

1163

1164 *Fig 13*

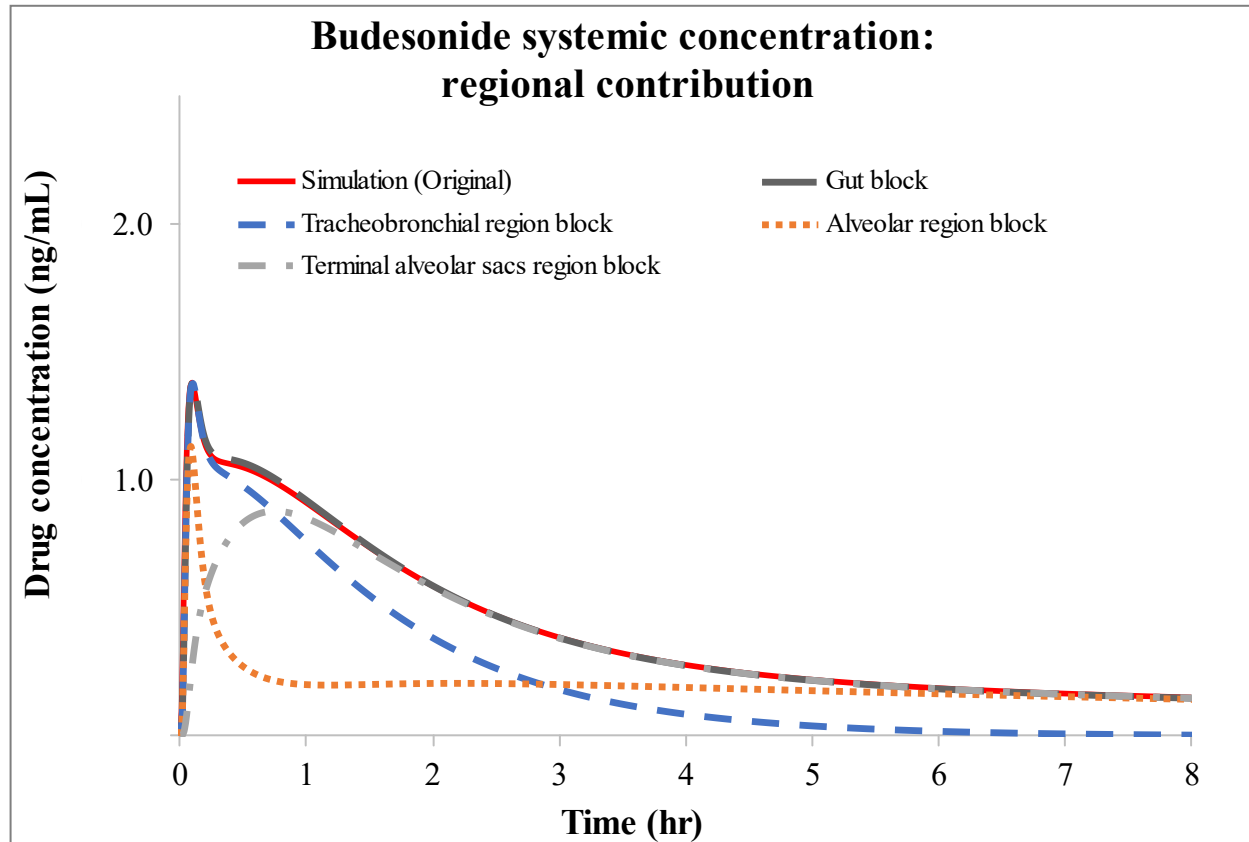

1165

1166 *Fig 14*
